# Supplementary material for: Synthesis and Biological Activity Characterization of Novel 5-Oxopyrrolidine Derivatives with Promising Anticancer and Antimicrobial Activity
Source: MDPI journal article supplement (doi:10.3390/ph15080970), 2022-08-06
Supplement: s1 [file s1]

**Supplementary Materials**

**Synthesis and biological activity characterization of novel 5-oxopyrrolidine derivatives with promising anticancer and antimicrobial activity**

**NMR Spectra (compounds 2, 4–22, all in DMSO-*d*<sub>6</sub>, Figures S1–S32)  
Supplementary Table S1.**

1-(4-Acetamidophenyl)-5-oxopyrrolidin-3-carboxylic acid (**2**)

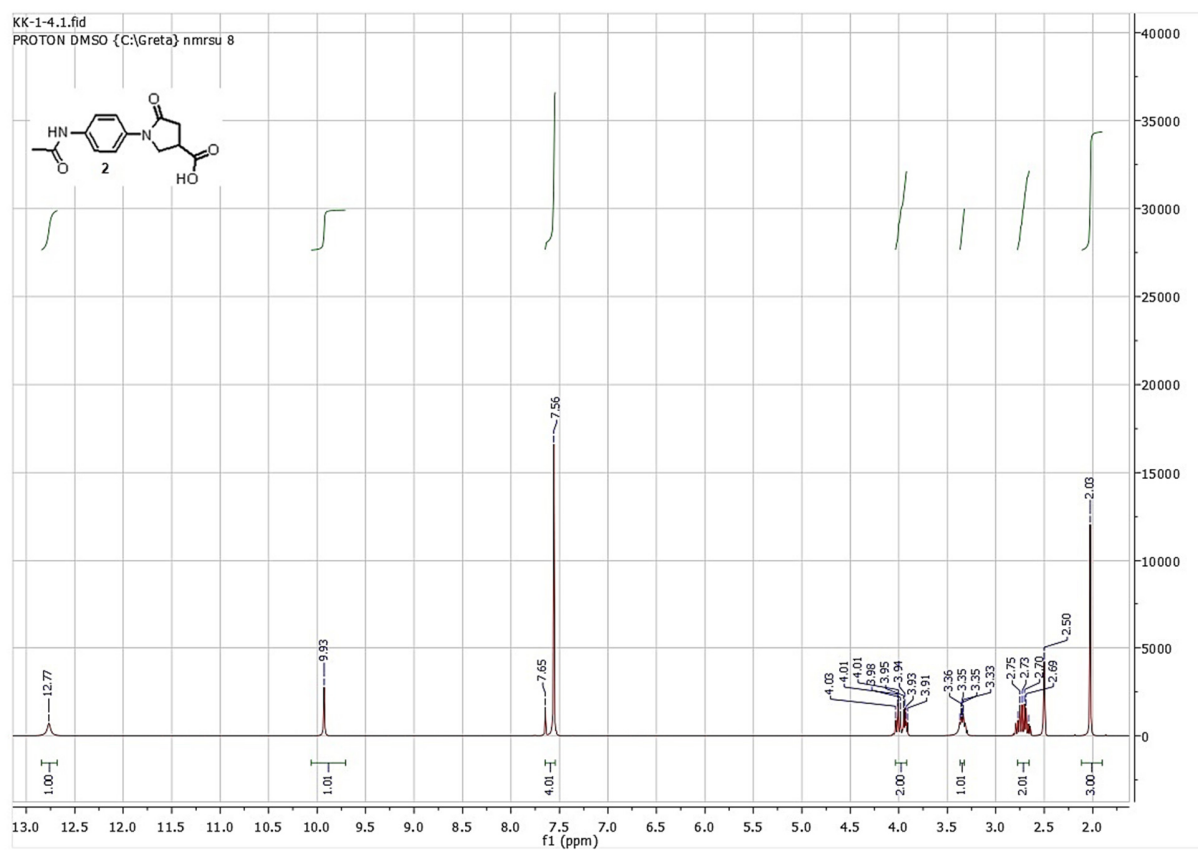

Figure S1. <sup>1</sup>H NMR of compound **2**.

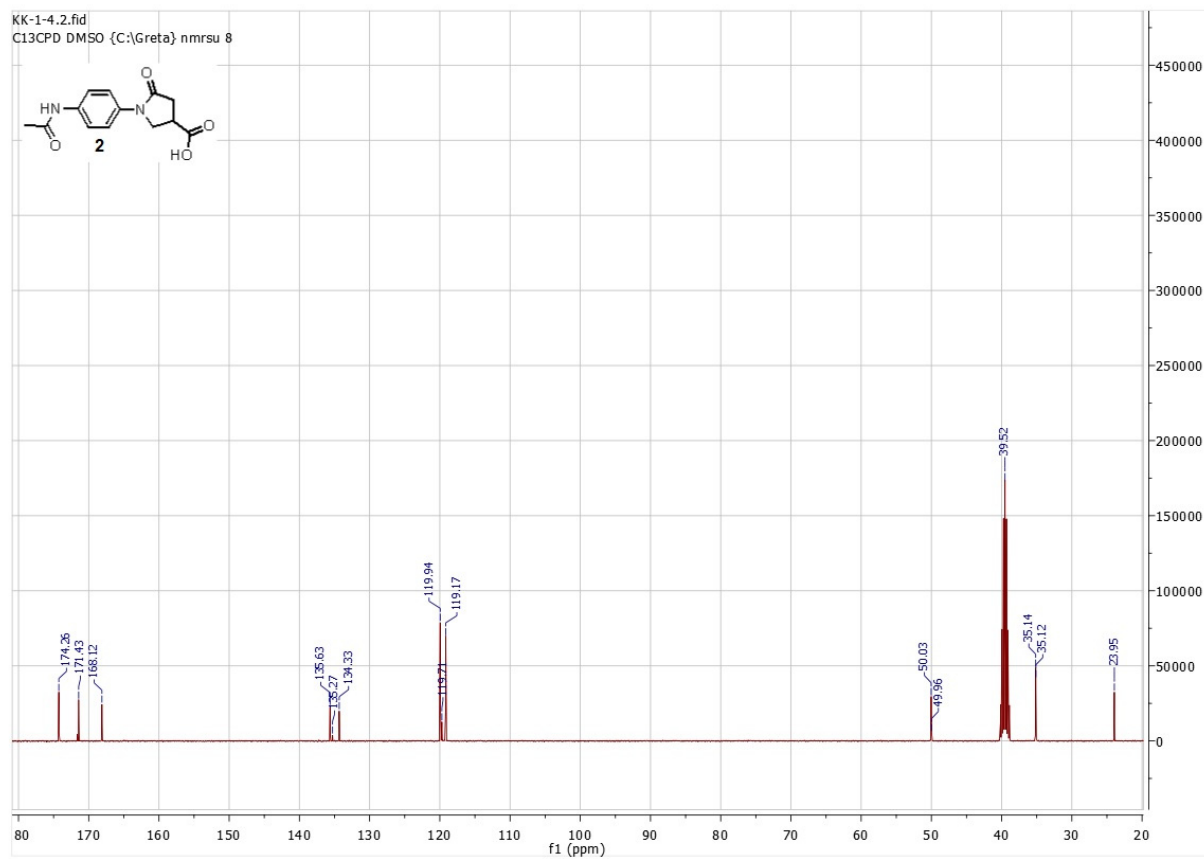

Figure S2. <sup>13</sup>C NMR of compound **2**.

*N*-(4-(4-(hydrazinecarbonyl)-2-oxopyrrolidin-1-yl)phenyl)acetamide (**4**)

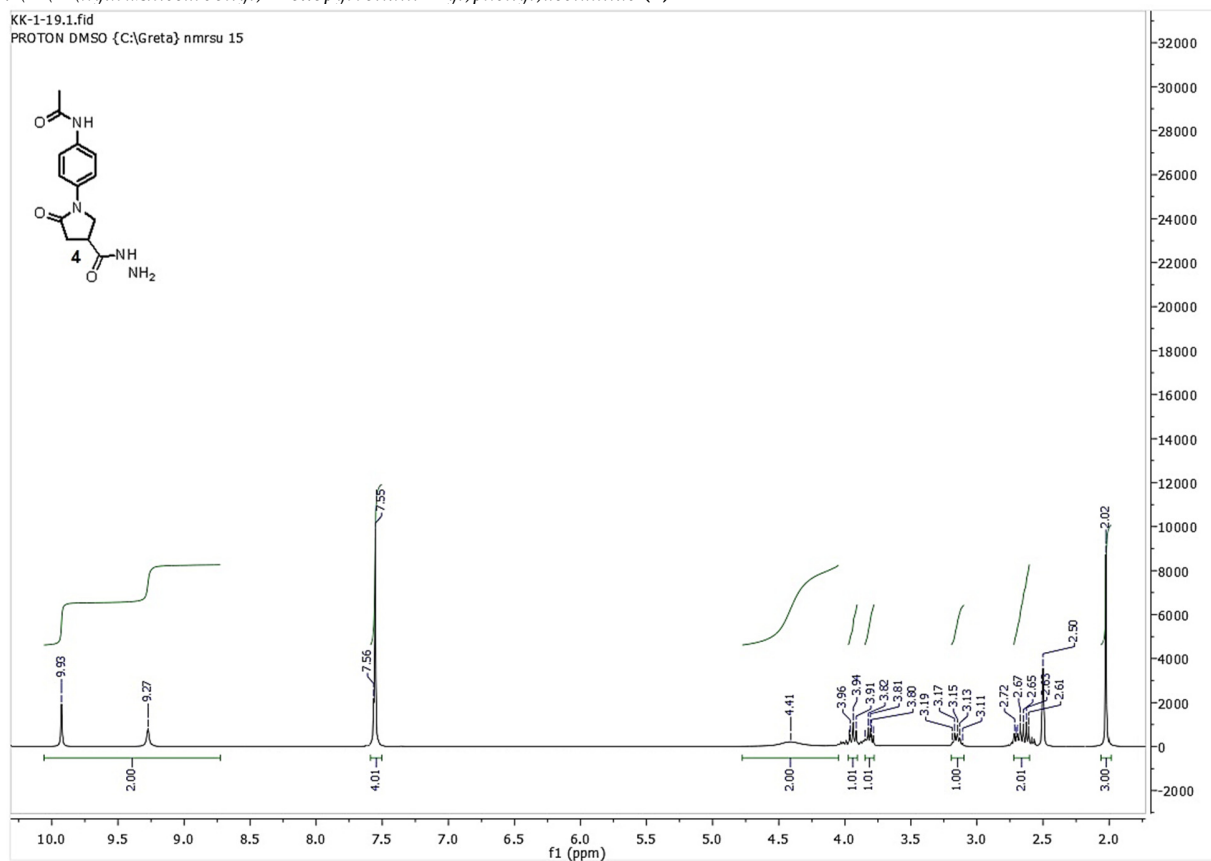

Figure S3.  $^1\text{H}$  NMR of compound **4**.

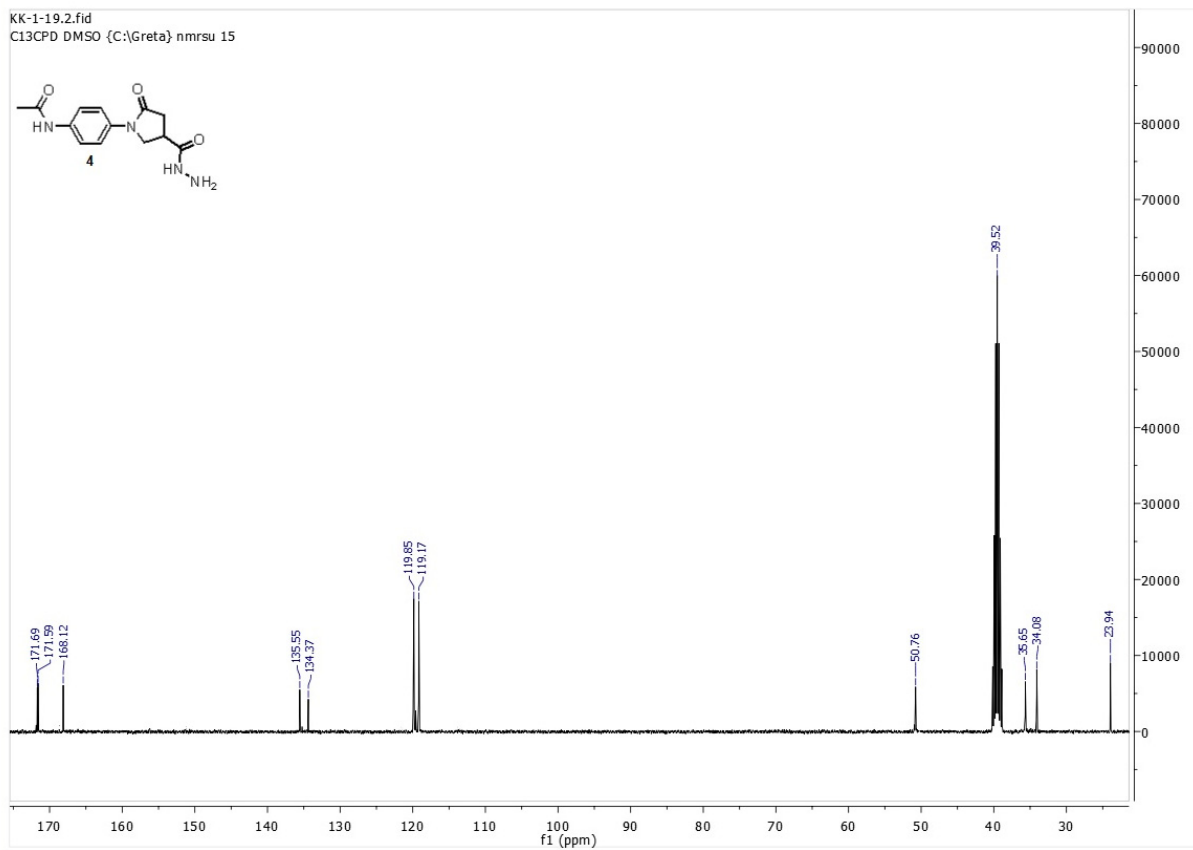

Figure S4.  $^{13}\text{C}$  NMR of compound **4**.

*N*-(4-(4-(2-benzylidenehydrazine-1-carbonyl)-2-oxopyrrolidin-1-yl)phenyl)acetamide (**5**).

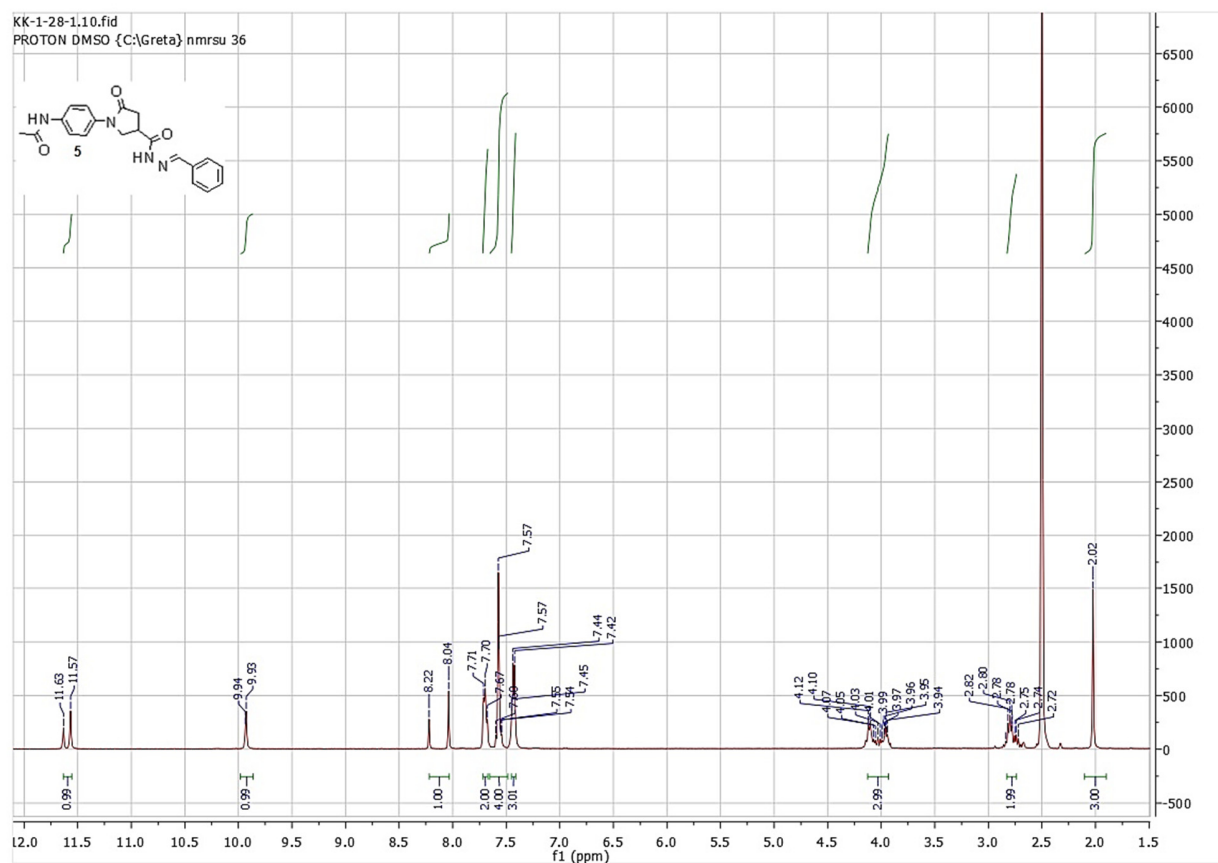

Figure S5.  $^1\text{H}$  NMR of compound **5**.



*N*-(4-(2-(4-chlorobenzylidene)hydrazine-1-carbonyl)-2-oxopyrrolidin-1-yl)phenyl)acetamide (**6**).

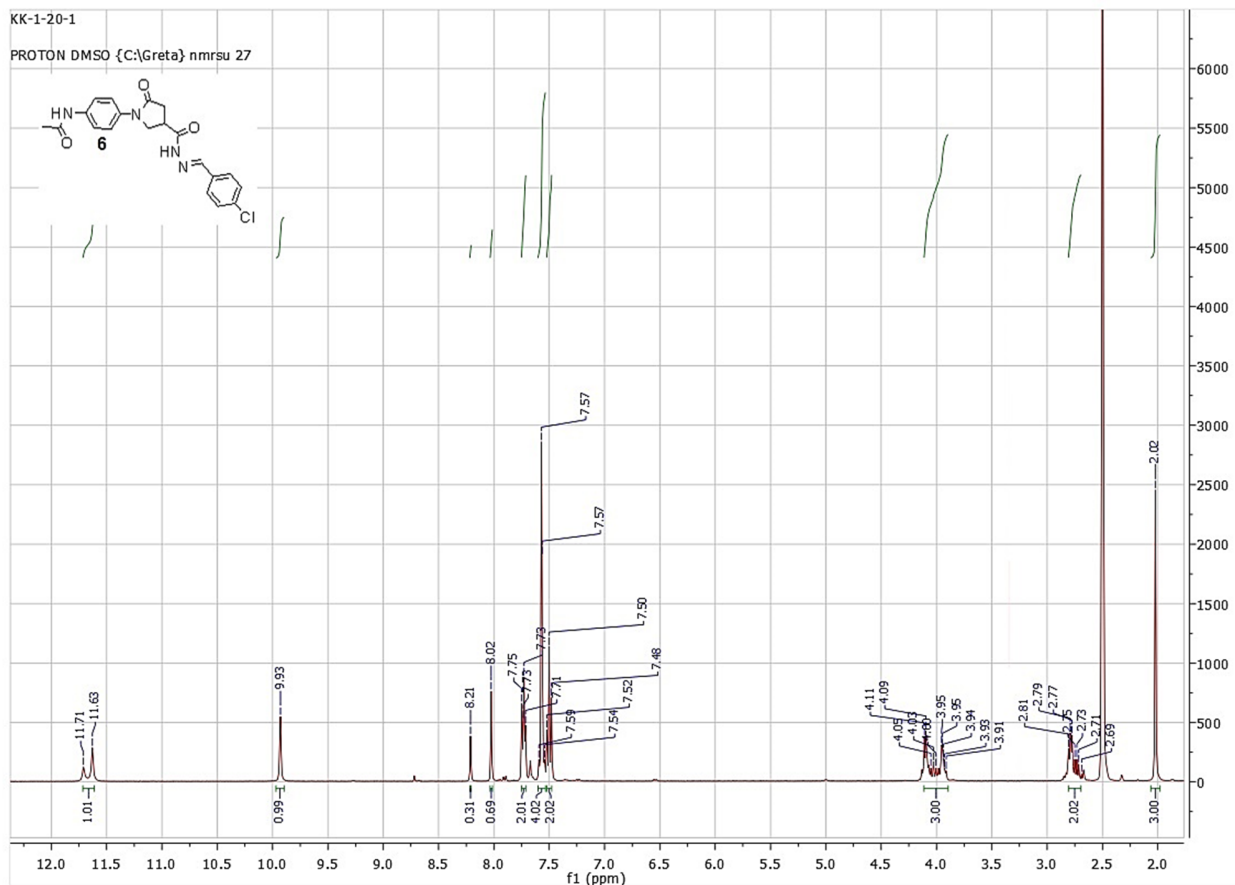

Figure S6.  $^1\text{H}$  NMR of compound **6**.

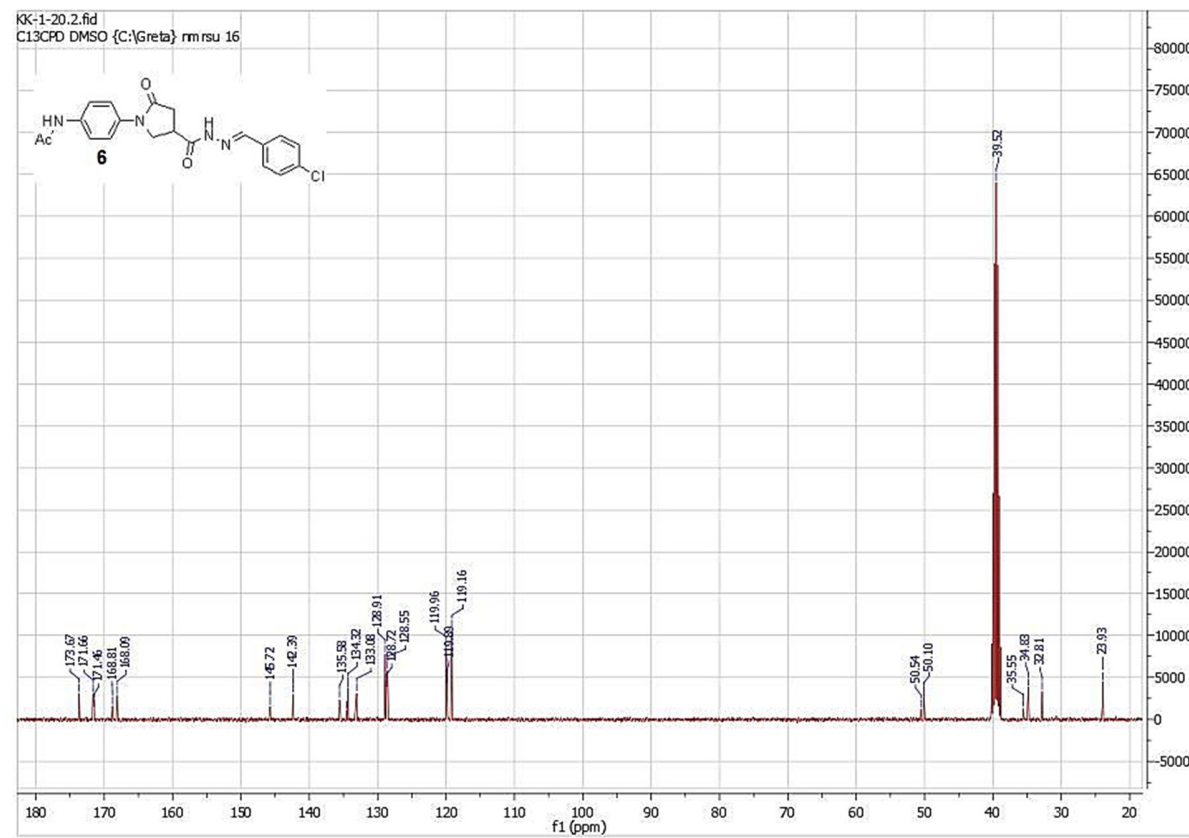

Figure S7.  $^{13}\text{C}$  NMR of compound **6**.

*N*-(4-(4-(2-(4-bromobenzylidene)hydrazine-1-carbonyl)-2-oxopyrrolidin-1-yl)phenyl)acetamide (**7**).

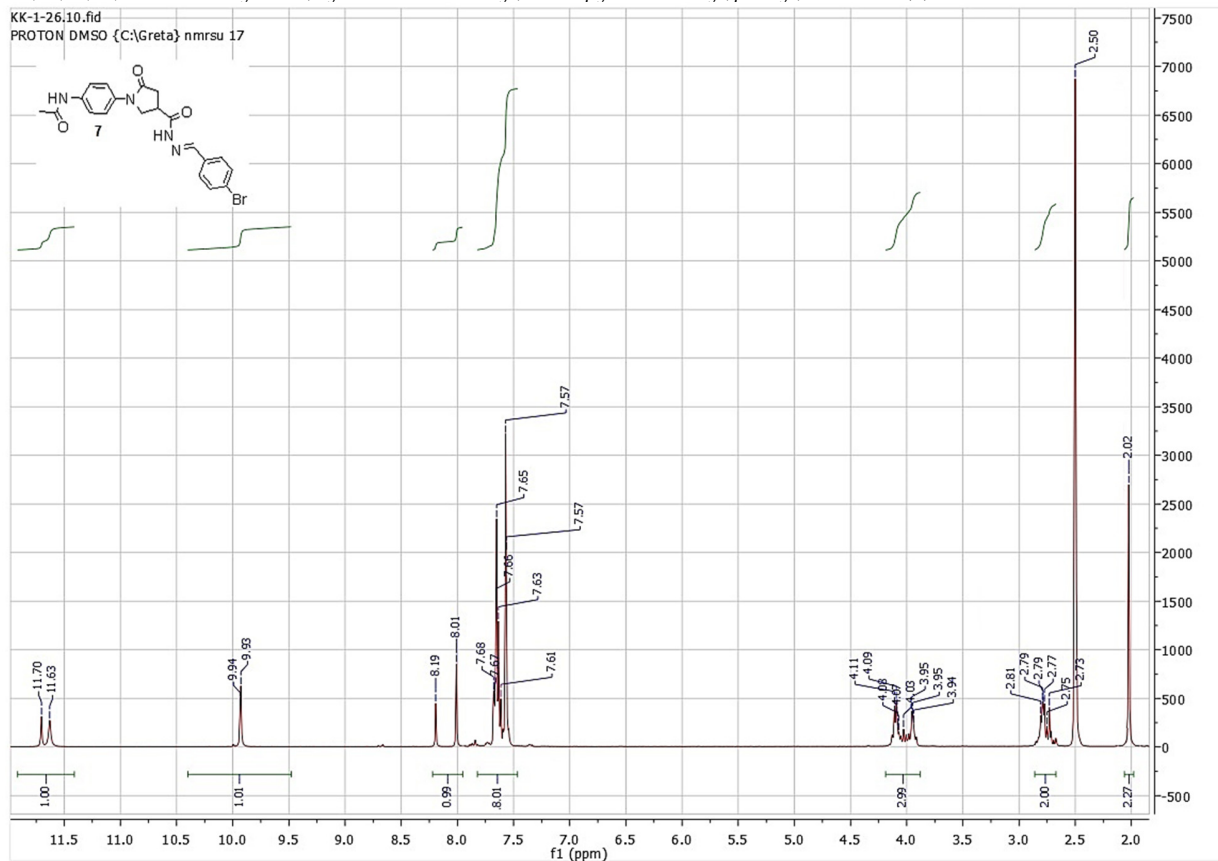

**Figure S8.**  $^1\text{H}$  NMR of compound **7**.

*N*-(4-(4-(2-(4-(dimethylamino)benzylidene)hydrazine-1-carbonyl)-2-oxopyrrolidin-1-yl)phenyl)acetamide (**8**).

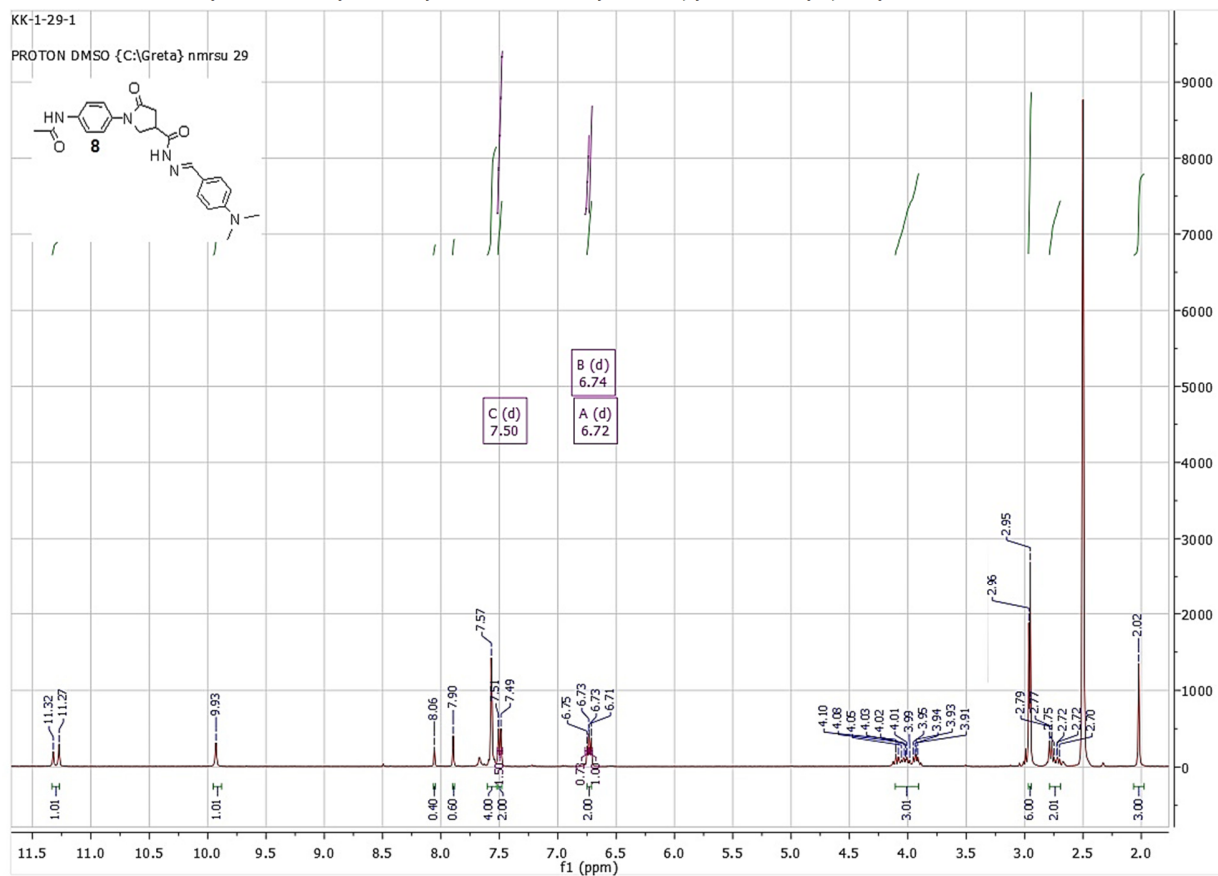

**Figure S9.**  $^1\text{H}$  NMR of compound **8**.

*N*-(4-(2-(4-methoxybenzylidene)hydrazine-1-carbonyl)-2-oxopyrrolidin-1-yl)phenyl)acetamide (**9**).

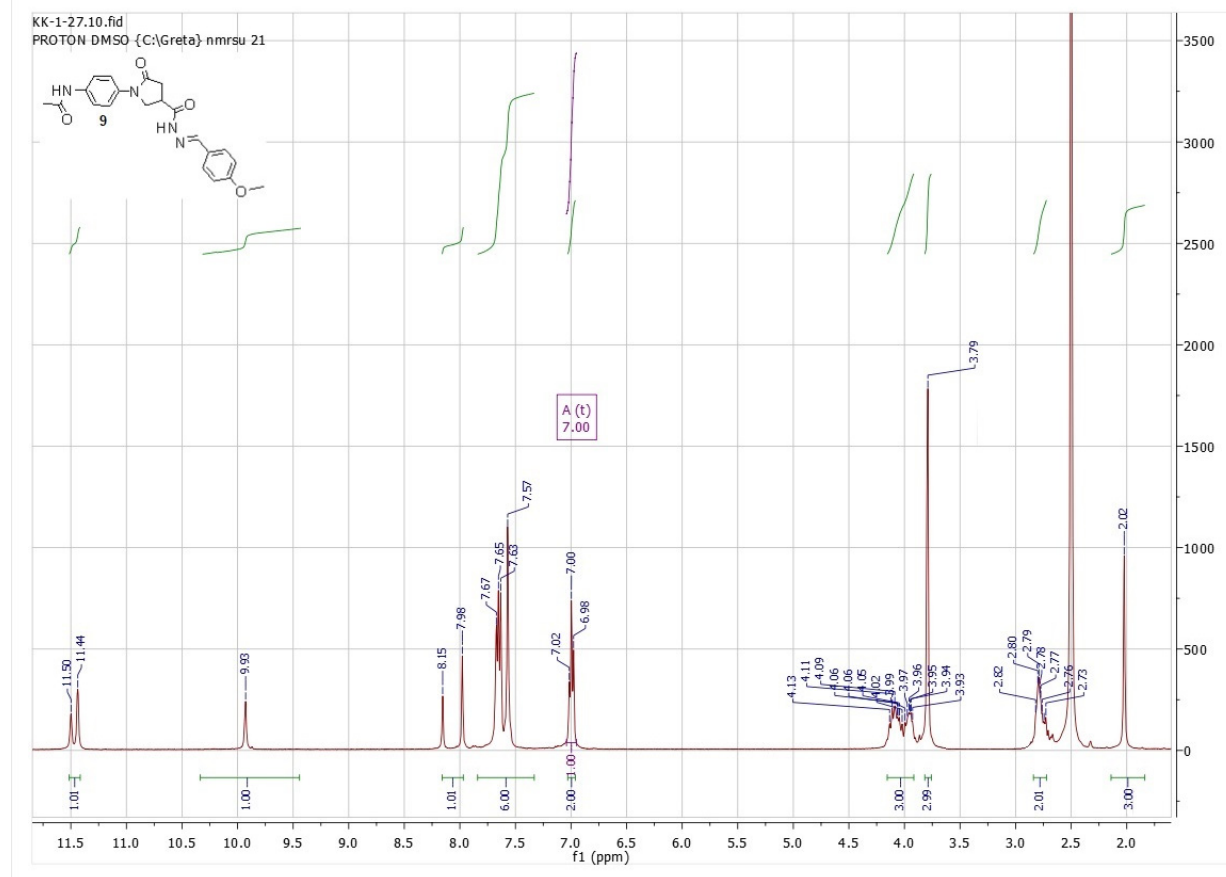

**Figure S10.**  $^1\text{H}$  NMR of compound **9**.

*N*-(4-(2-(2,5-dimethoxybenzylidene)hydrazine-1-carbonyl)-2-oxopyrrolidin-1-yl)phenyl)acetamide (**10**).

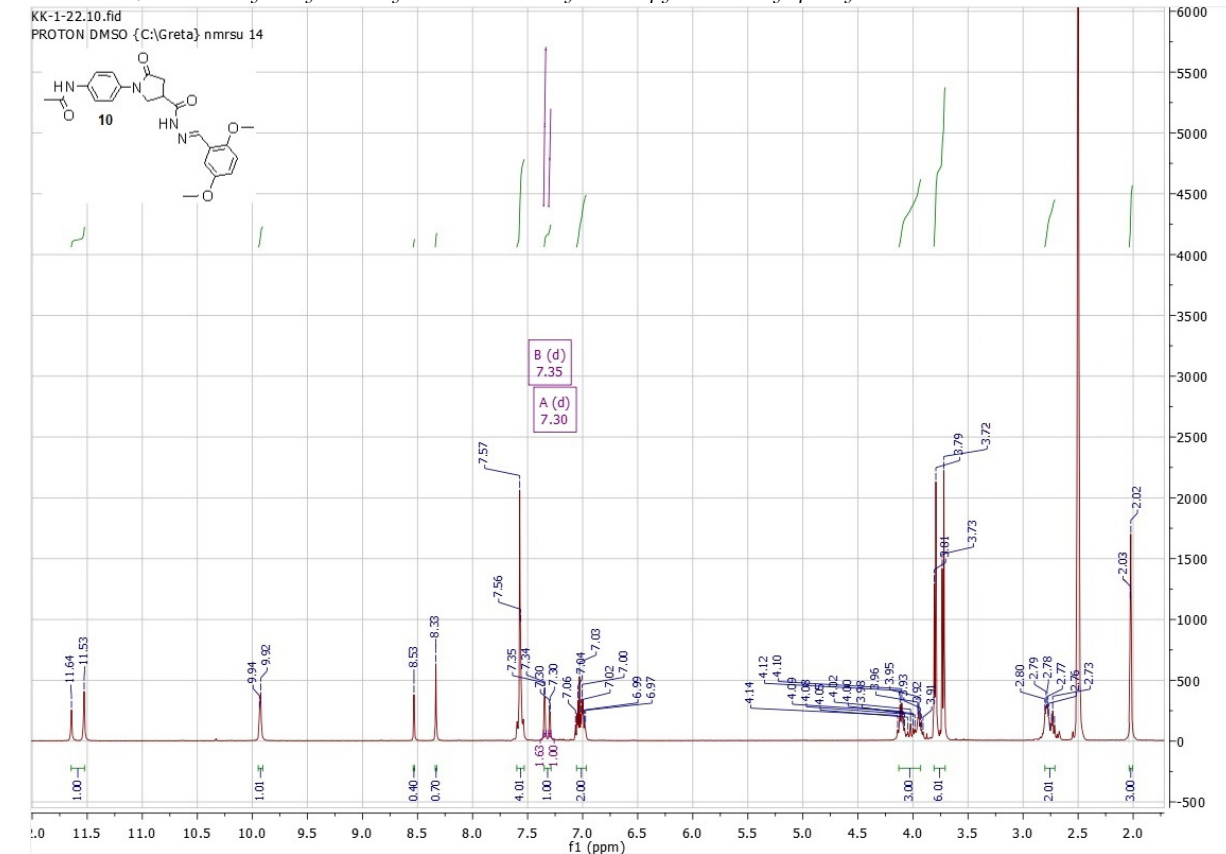

**Figure S11.**  $^1\text{H}$  NMR of compound **10**.

*N*-(4-(2-oxo-4-(2-(2,4,6-trimethoxybenzylidene)hydrazine-1-carbonyl)pyrrolidin-1-yl)phenyl)acetamide (**11**).

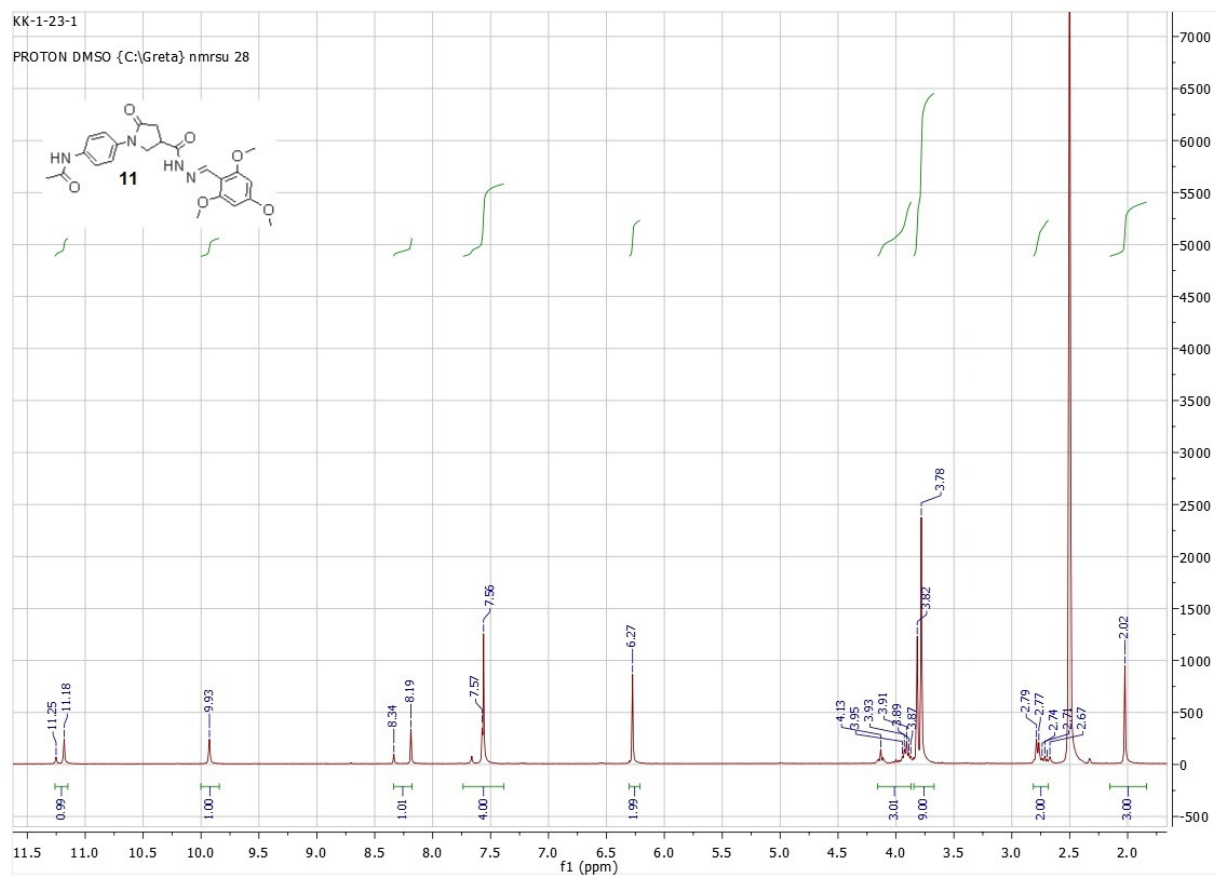

**Figure S12.**  $^1\text{H}$  NMR of compound **11**.

*N*-(4-(2-oxo-4-(2-(propan-2-ylidene)hydrazine-1-carbonyl)pyrrolidin-1-yl)phenyl)acetamide (**12**).

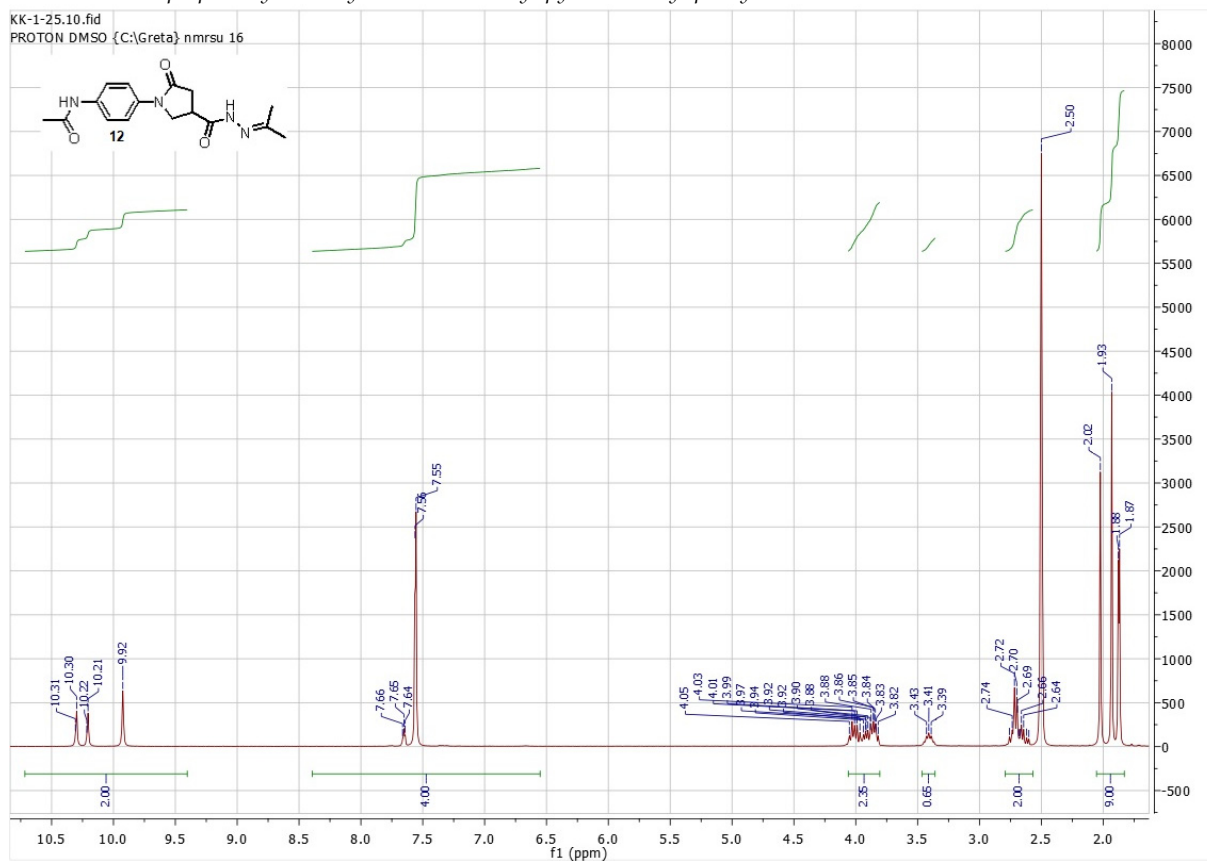

**Figure S13.**  $^1\text{H}$  NMR of compound **12**.

*N*-(4-(4-(2-(butan-2-ylidene)hydrazine-1-carbonyl)-2-oxopyrrolidin-1-yl)phenyl)acetamide (**13**).

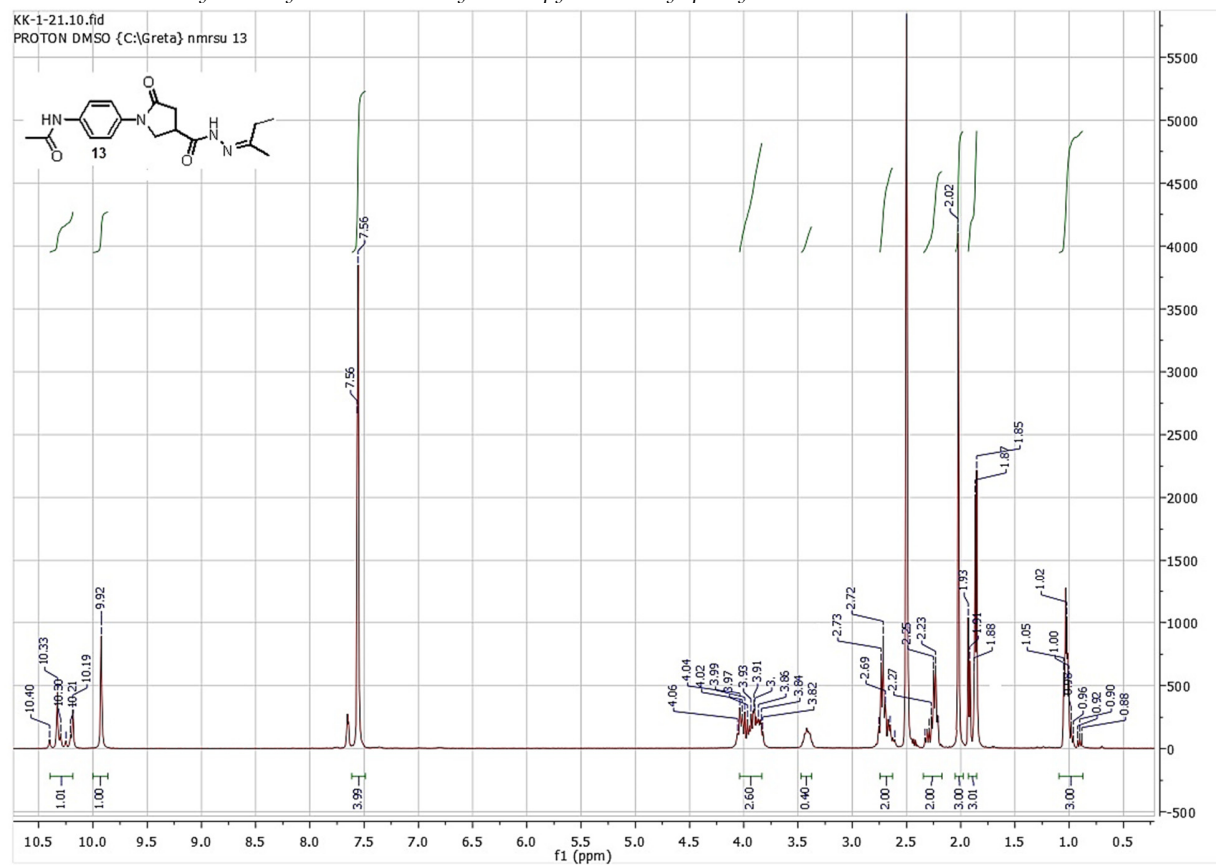

Figure S14.  $^1\text{H}$  NMR of compound **13**.

*N*-(4-(4-(3,5-dimethyl-1*H*-pyrazol-1-carbonyl)-2-oxopyrrolidin-1-yl)phenyl)acetamide (**14**).

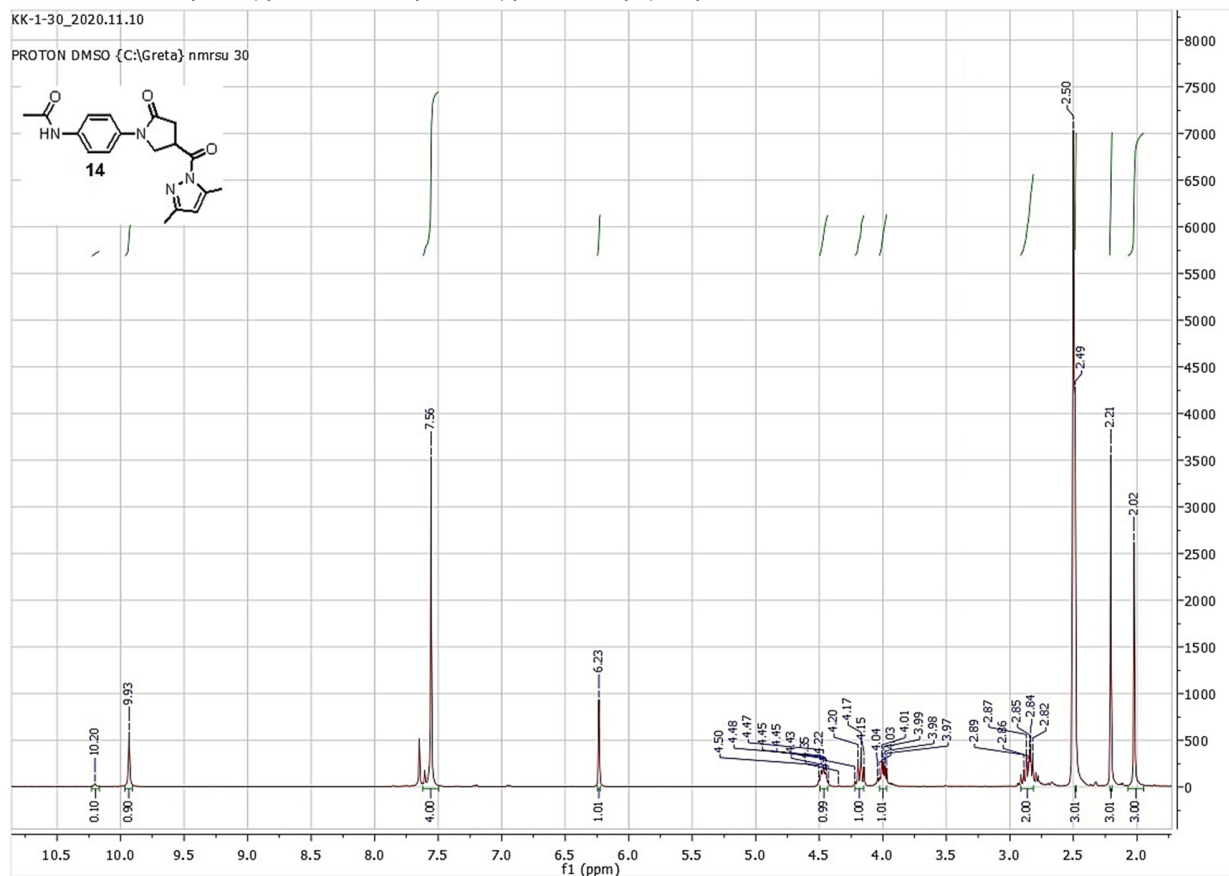

Figure S15. <sup>1</sup>H NMR of compound **14**.

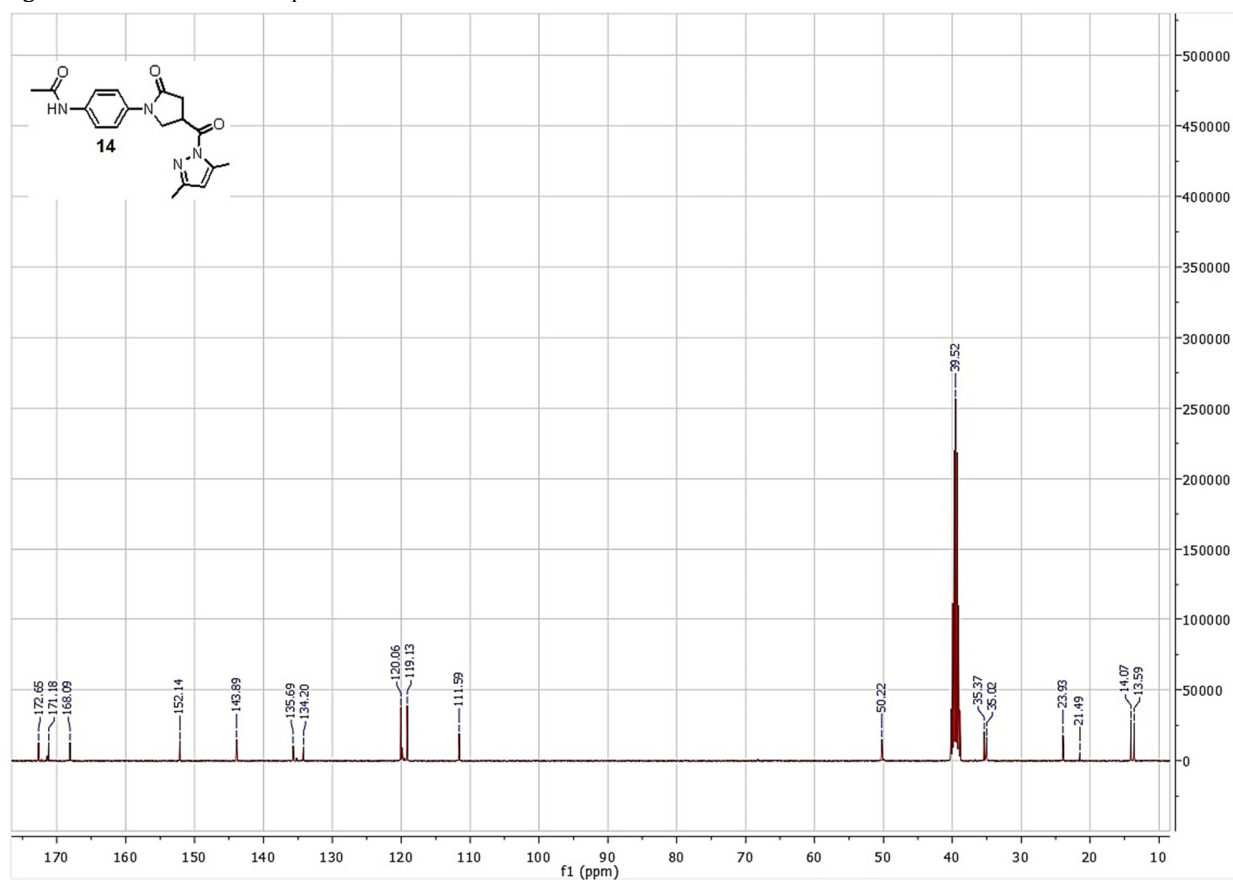

Figure S16. <sup>13</sup>C NMR of compound **14**.

*N*-(4-(4-(2-(2,5-dimethyl-1H-pyrrol-1-yl)acetyl)-2-oxopyrrolidin-1-yl)phenyl)acetamide (**15**).

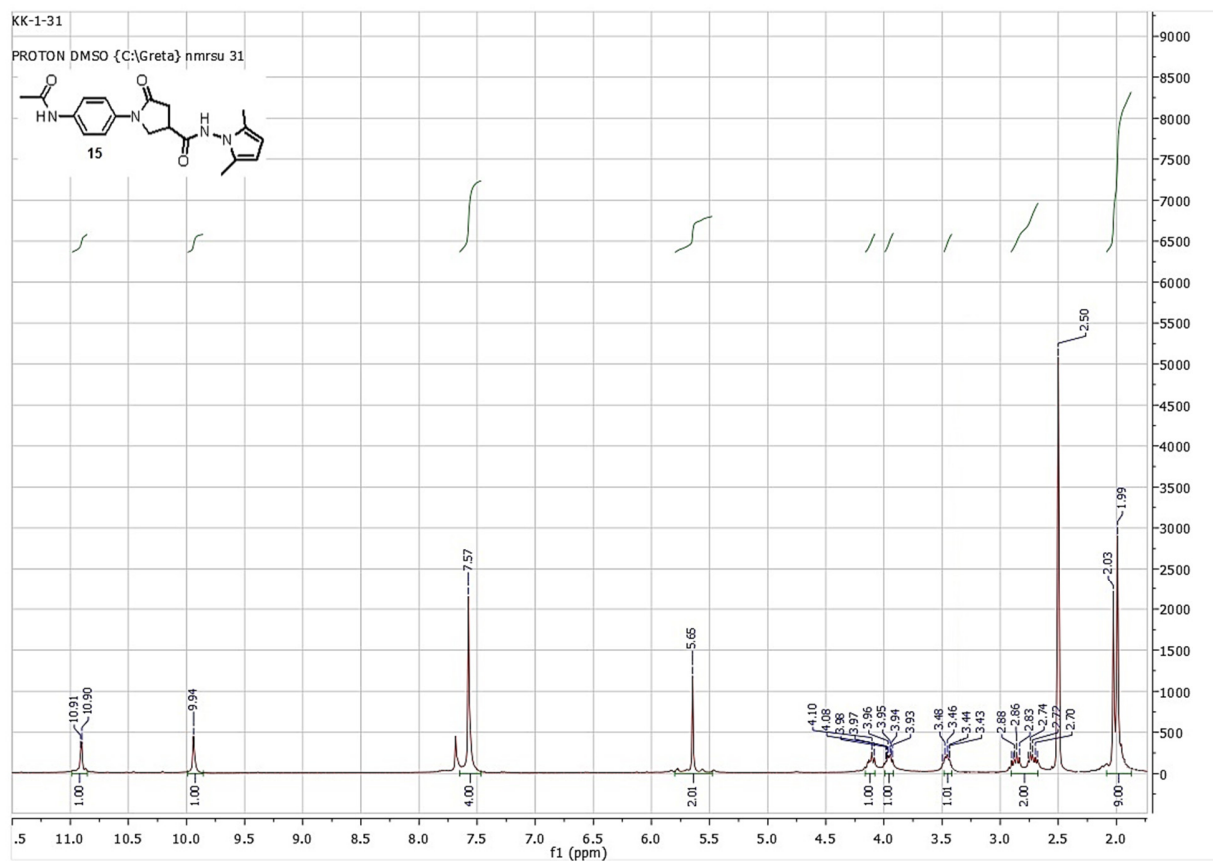

Figure S17.  $^1\text{H}$  NMR of compound **15**.

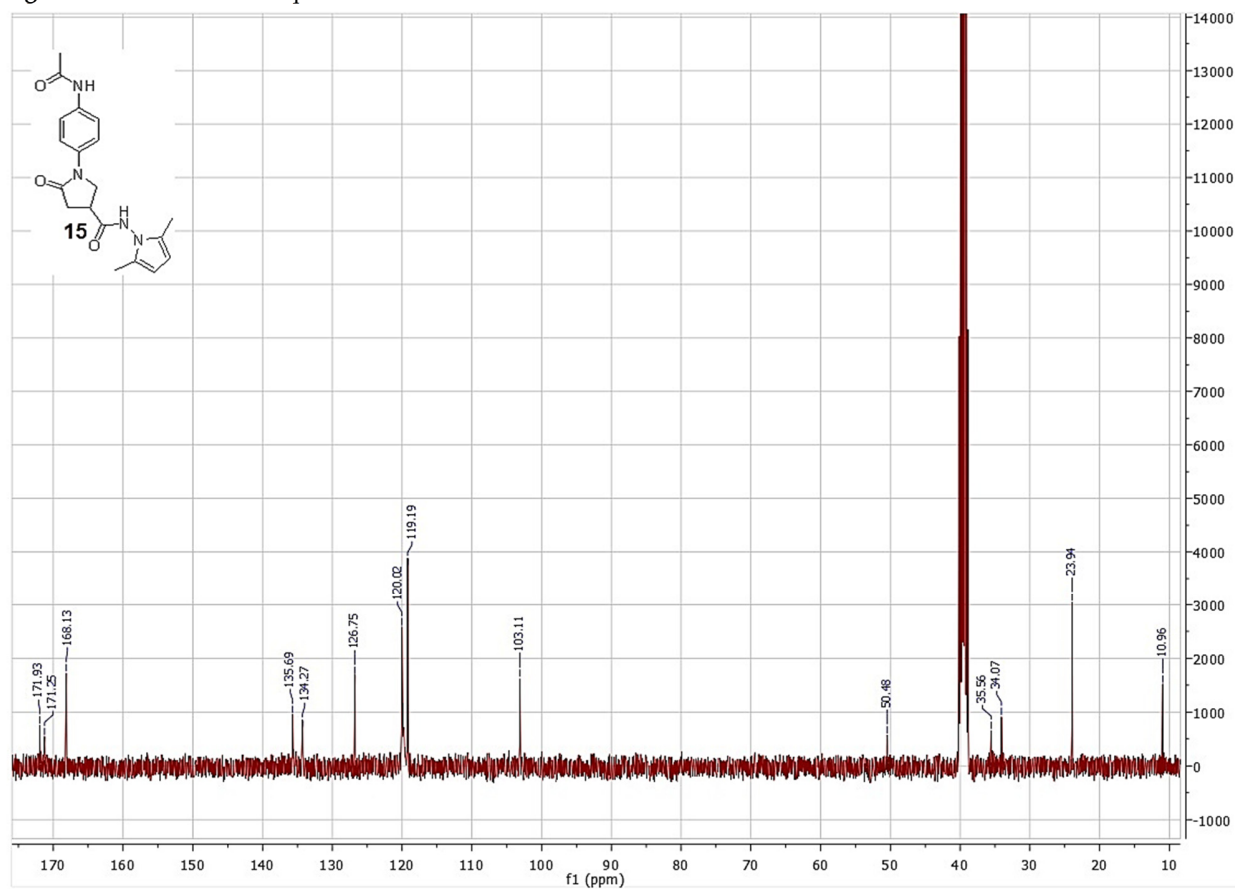

Figure S18.  $^{13}\text{C}$  NMR of compound **15**.



1-(4-Aminophenyl)-5-oxopyrrolidine-3-carboxylic acid (**16**).

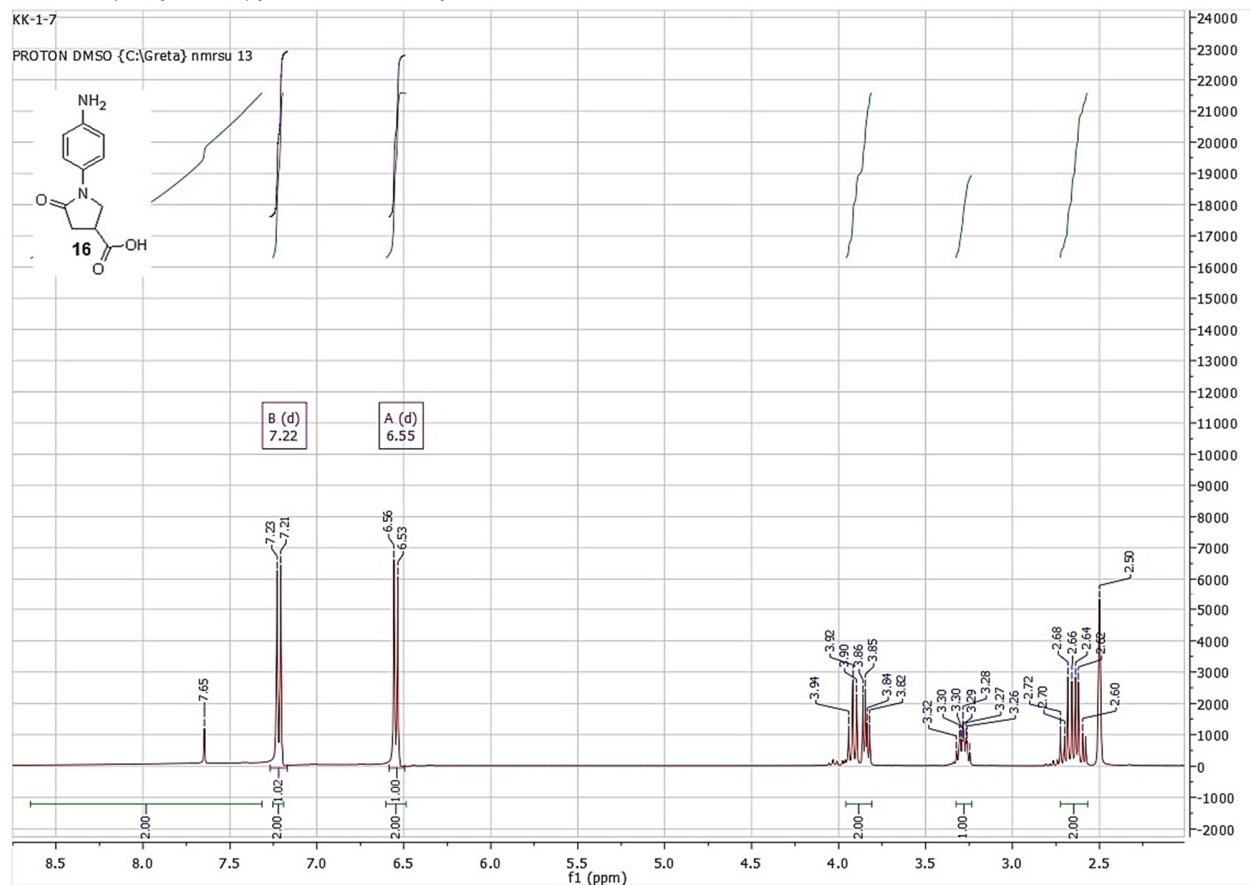

Figure S19.  $^1\text{H}$  NMR of compound **16**.

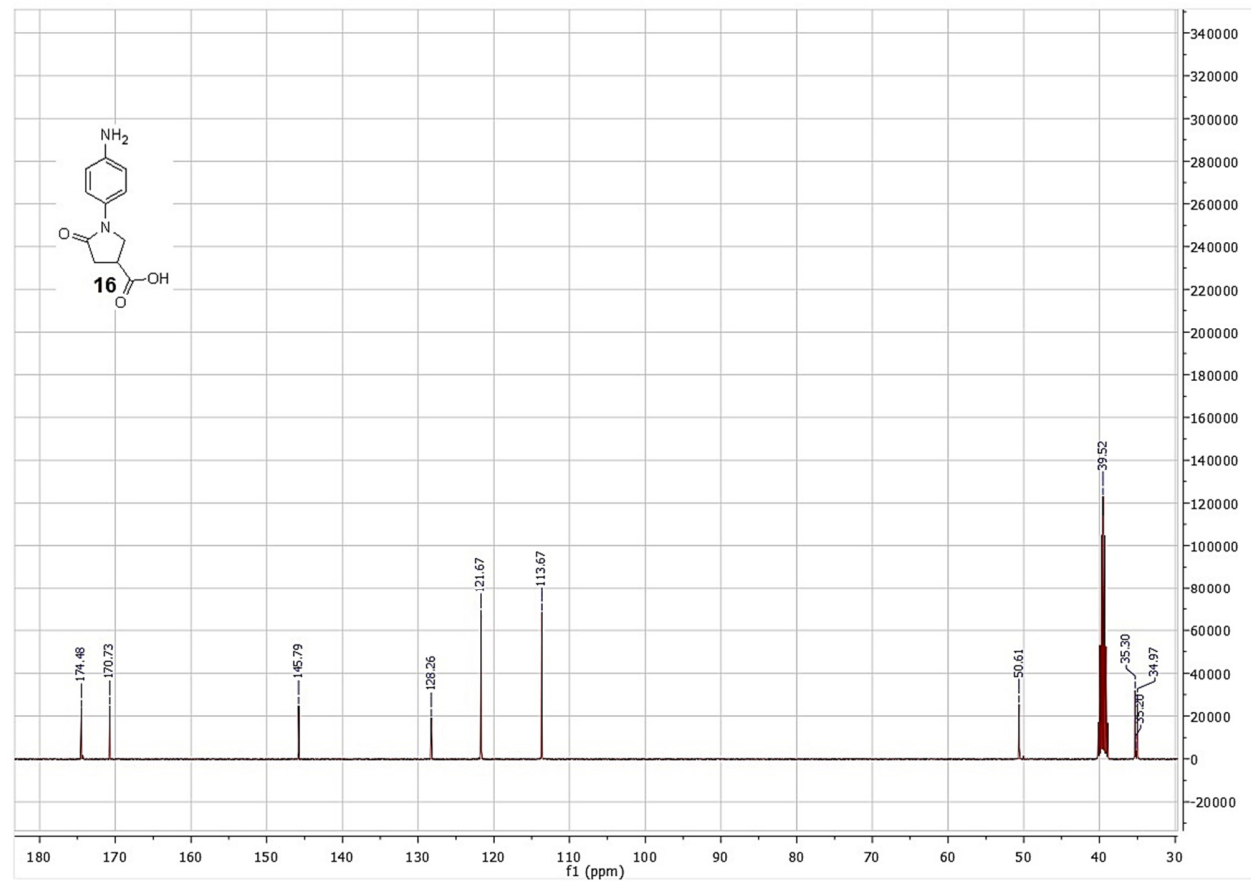

Figure S20.  $^{13}\text{C}$  NMR of compound **16**.



1-(4-Aminophenyl)-5-oxopyrrolidine-3-carbohydrazide (**17**).

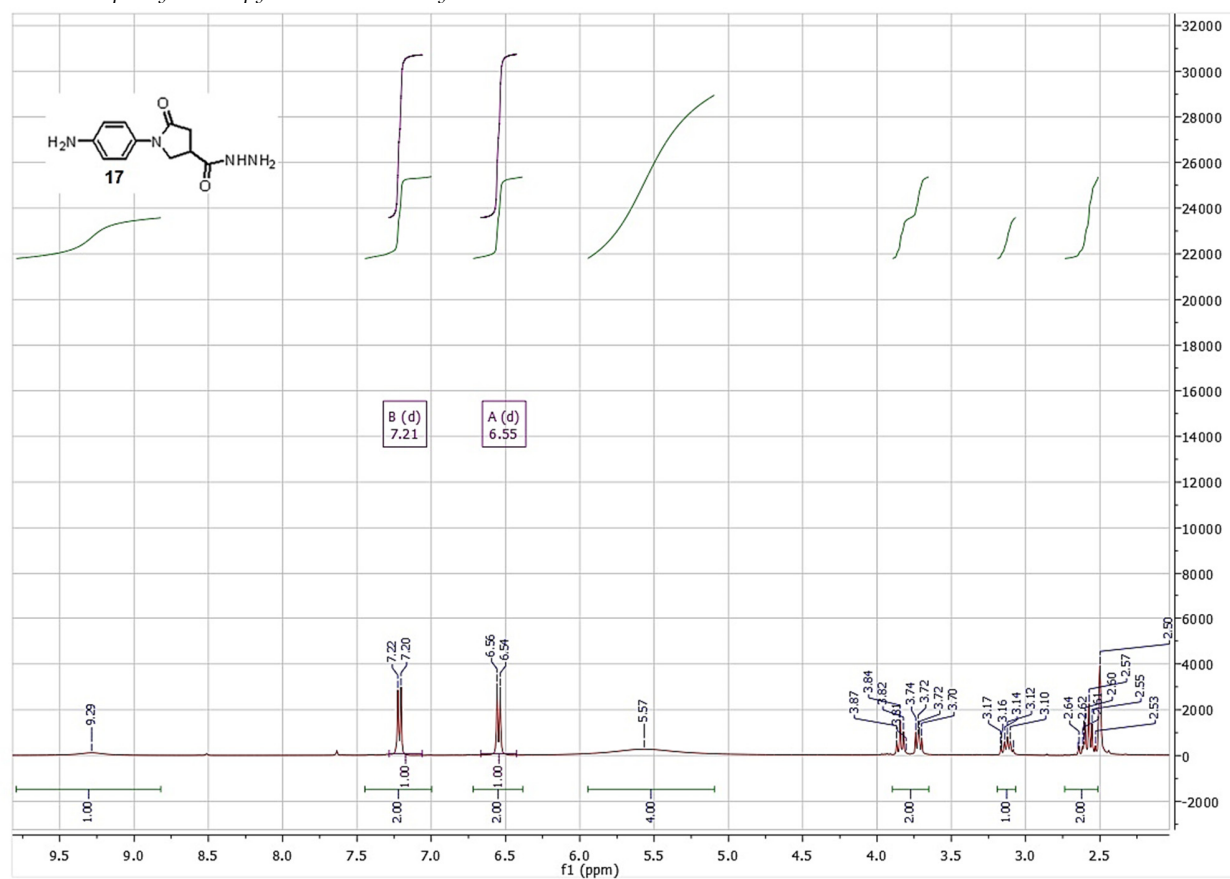

Figure S21. <sup>1</sup>H NMR of compound **17**.

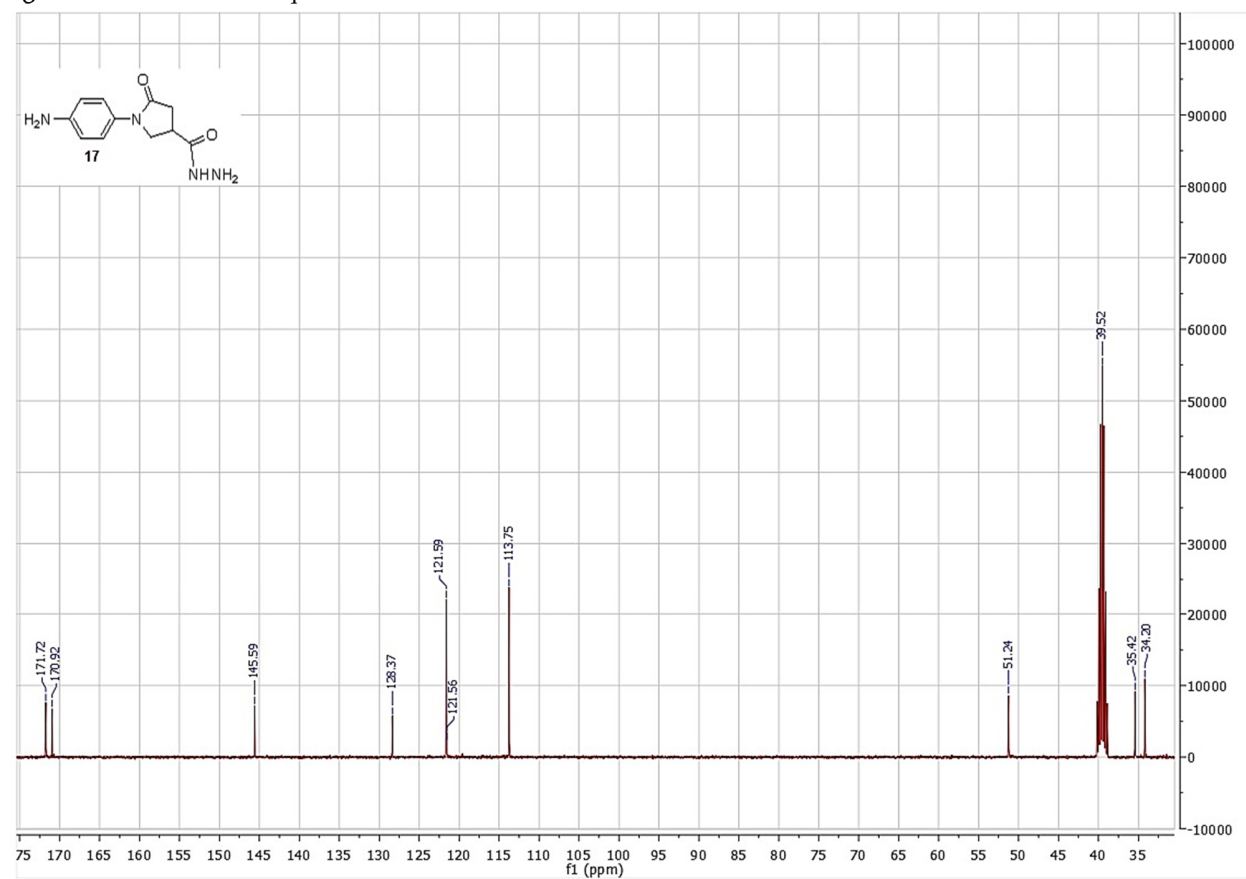

Figure S22. <sup>13</sup>C NMR of compound **17**.

1-(4-Aminophenyl)-4-(1H-benzo[d]imidazol-2-yl)pyrrolidin-2-one (**18**).

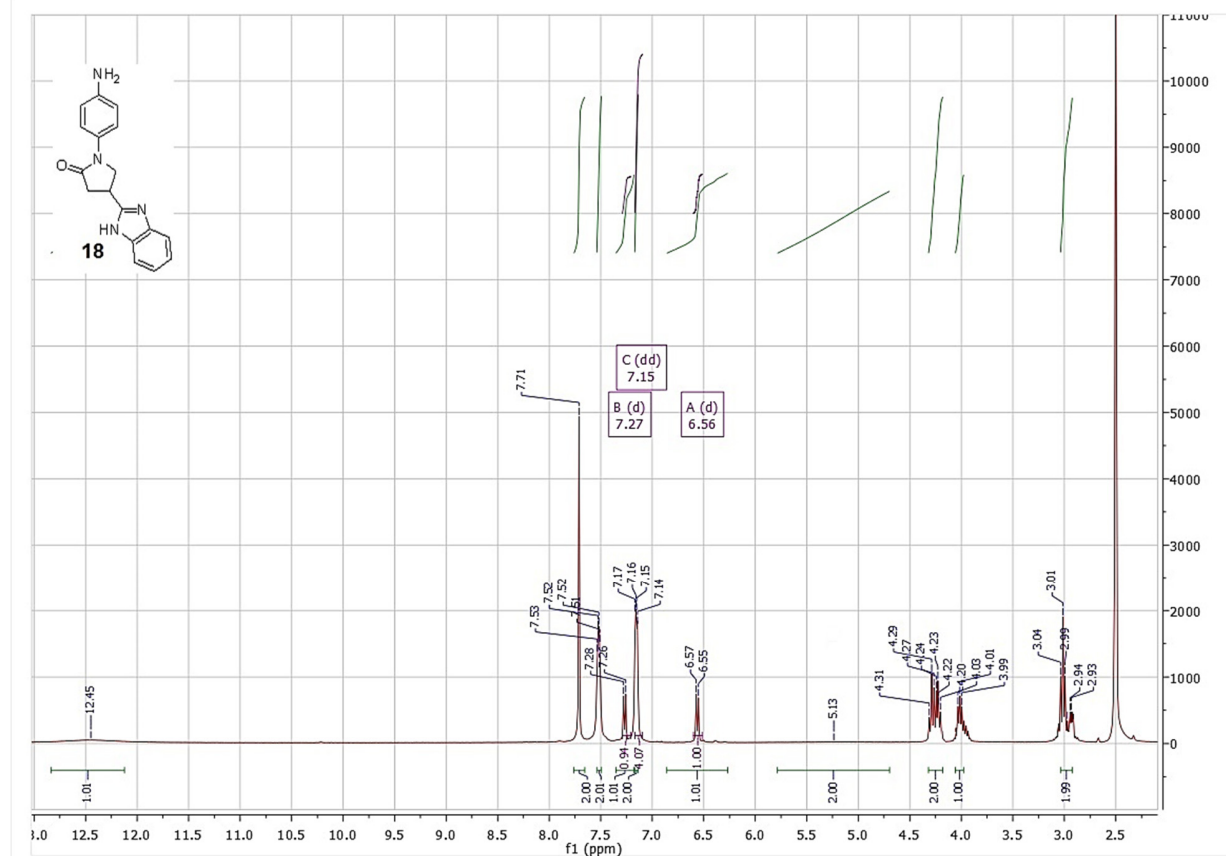

Figure S23. <sup>1</sup>H NMR of compound **18**.

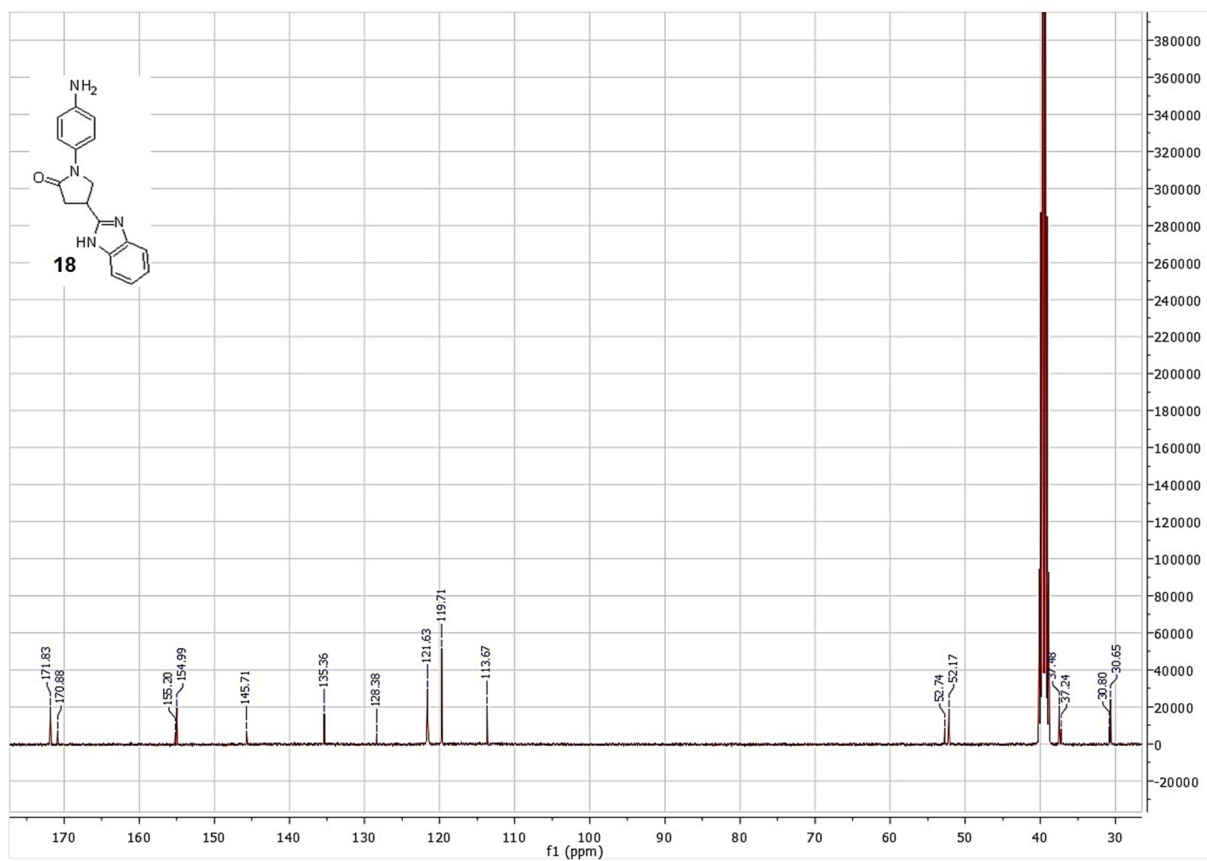

Figure S24. <sup>13</sup>C NMR of compound **18**.

1-(4-(2,5-Dimethyl-1H-pyrrol-1-yl)phenyl)-5-oxypyrrolidine-3-carboxylic acid (**19**).

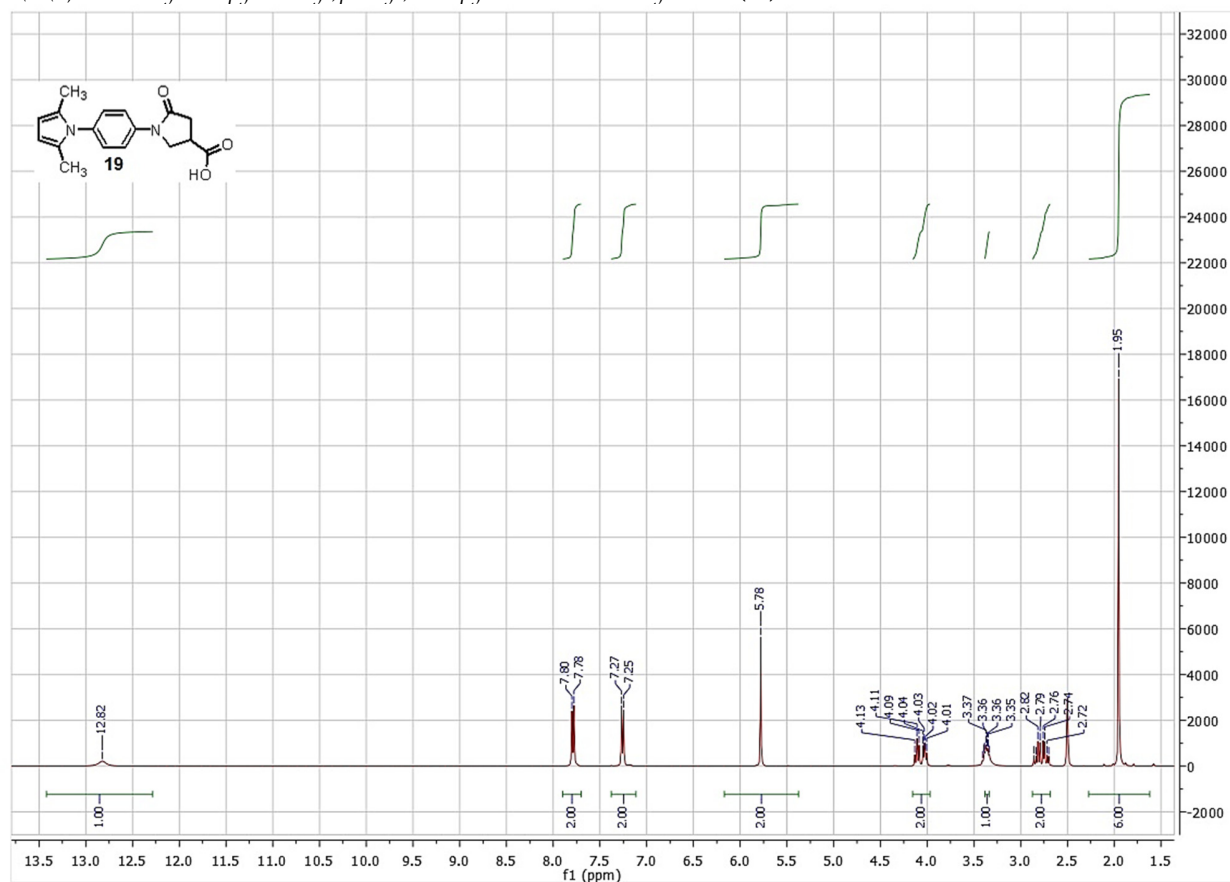

Figure S25. <sup>1</sup>H NMR of compound **19**.

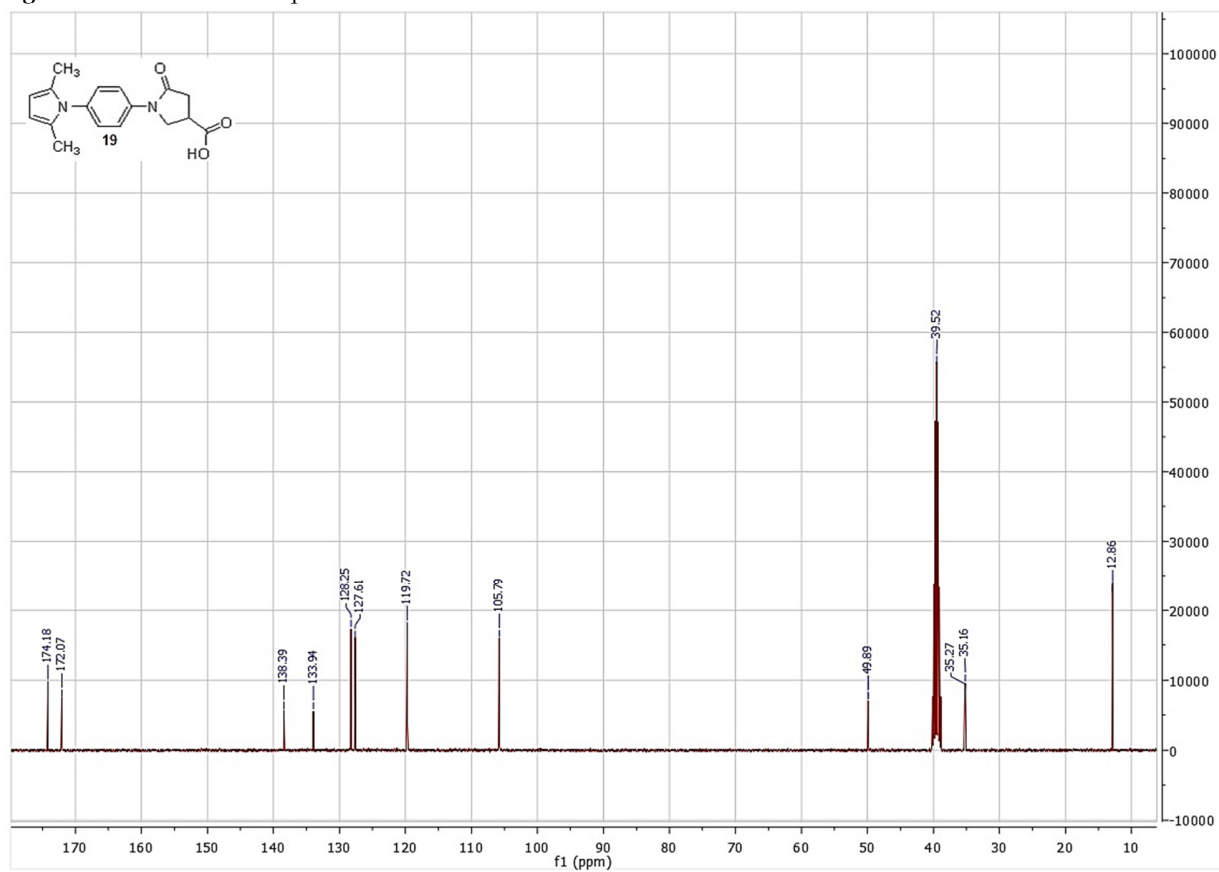

Figure S26. <sup>13</sup>C NMR of compound **19**.

5-Oxo-N'-(thiophen-2-ylmethylene)-1-(4-((thiophen-2-ylmethylene)amino)phenyl)pyrrolidine-3-carbohydrazide (**20**).

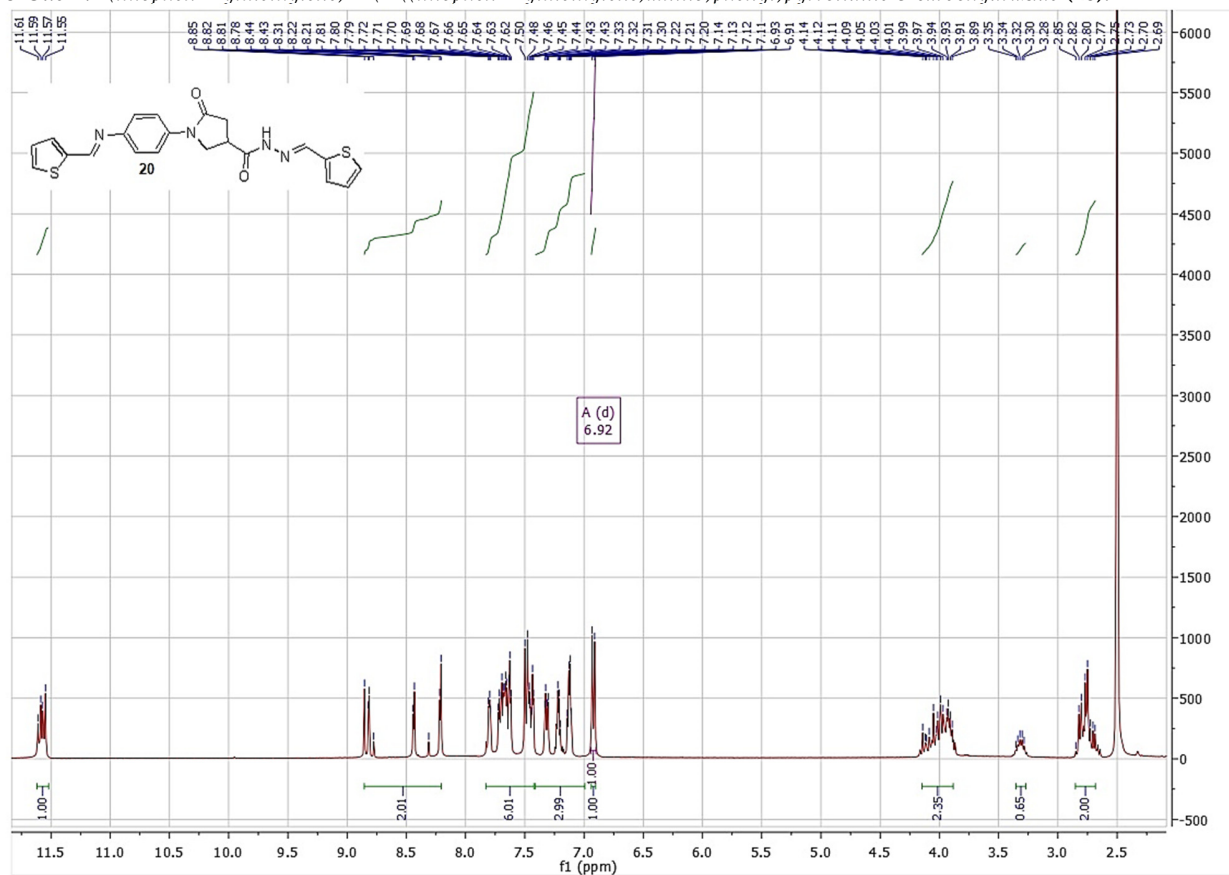

Figure S27. <sup>1</sup>H NMR of compound 20.

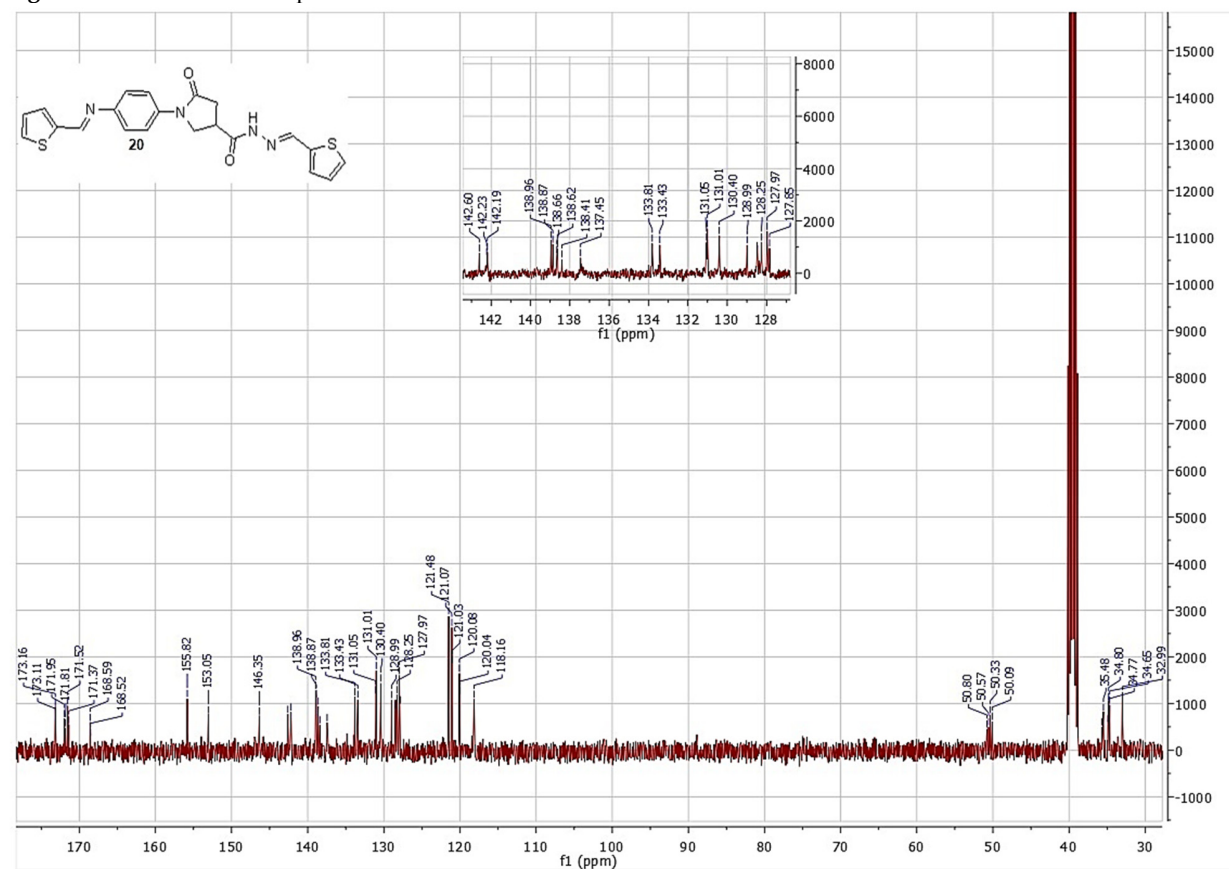

Figure S28. <sup>13</sup>C NMR of compound 20.

*N'*-((5-nitrothiophen-2-yl)methylene)-1-(4-(((5-nitrothiophen-2-yl)methylene)amino)phenyl)-5-oxopyrrolidine-3-carbohydrazide (**21**).

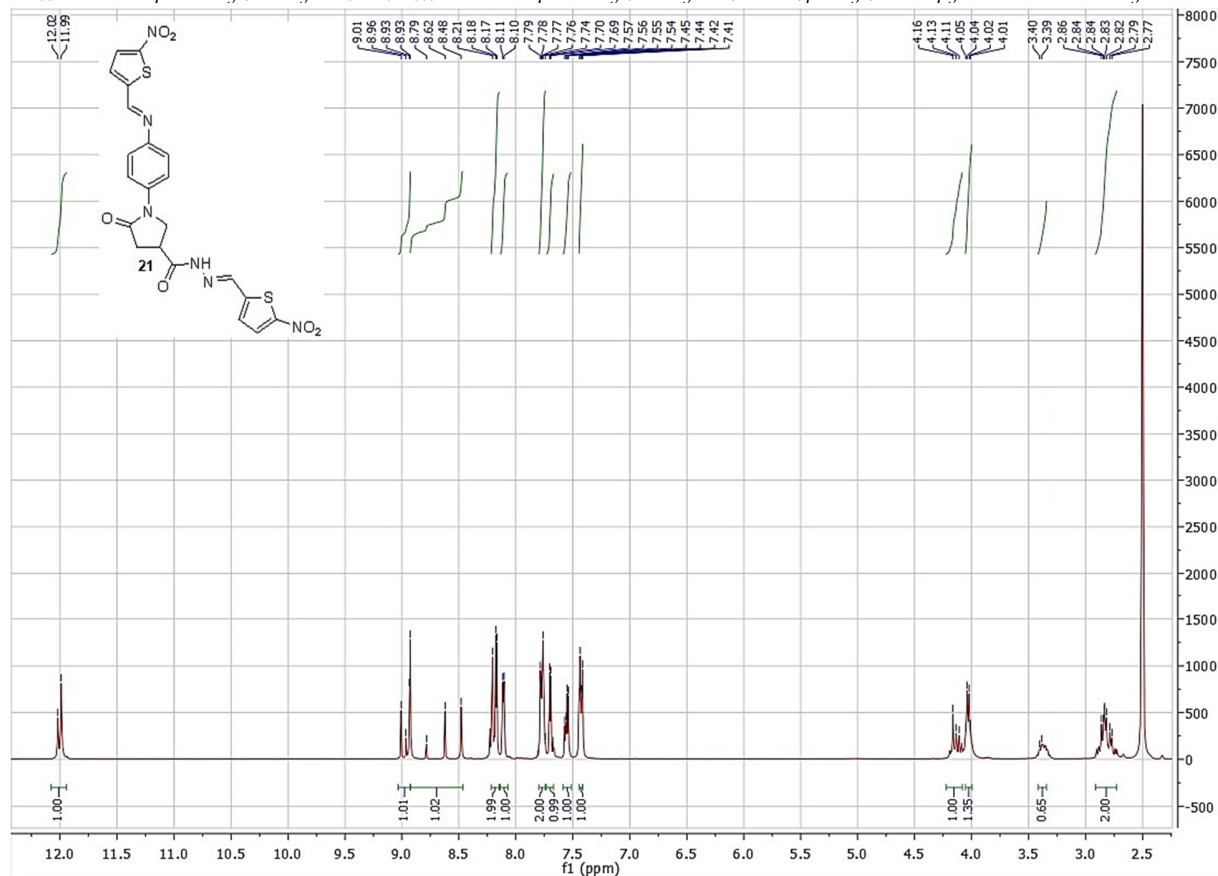

Figure S29. <sup>1</sup>H NMR of compound **21**.

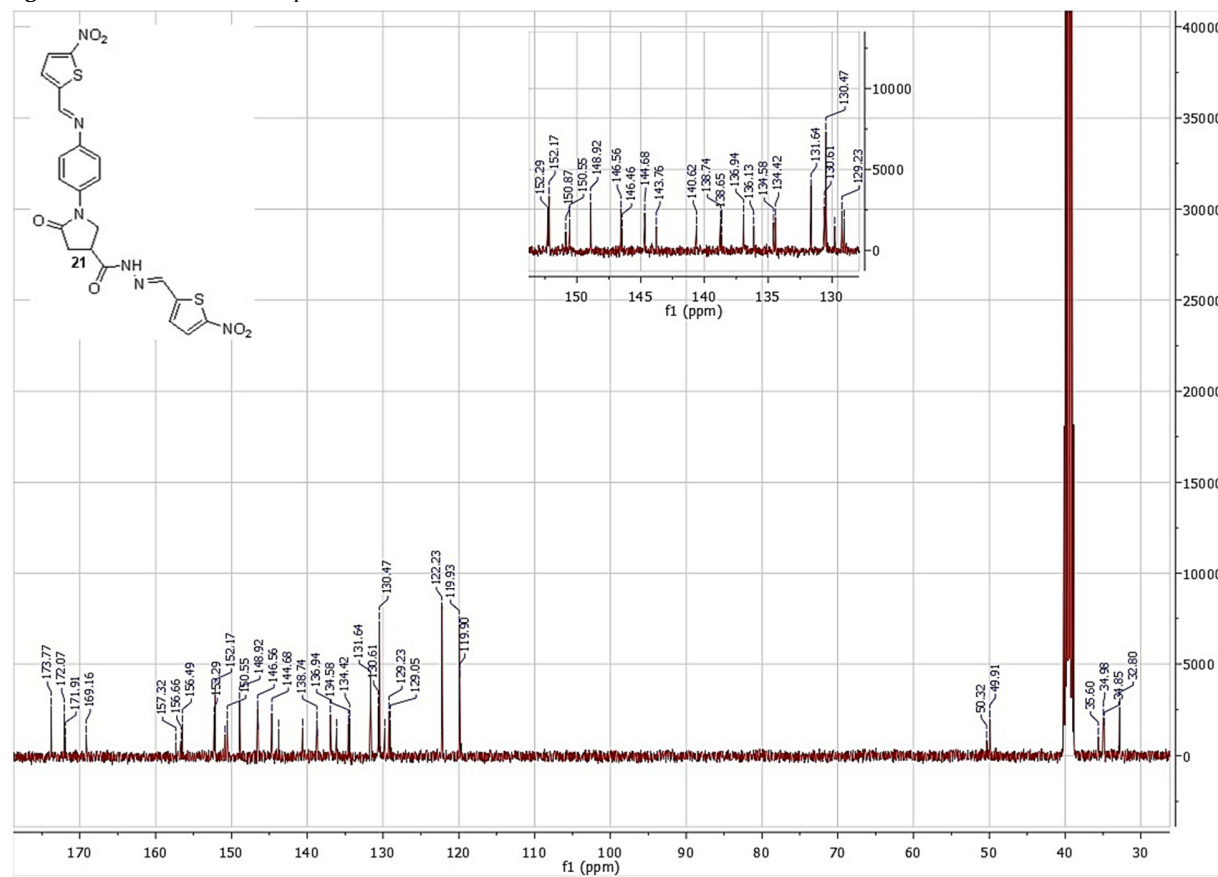

Figure S30. <sup>13</sup>C NMR of compound **21**.

*N*-(2,5-dimethyl-1*H*-pyrrol-1-yl)-1-(4-(2,5-dimethyl-1*H*-pyrrol-1-yl)phenyl)-5-oxopyrrolidine-3-carboxamide (**22**).

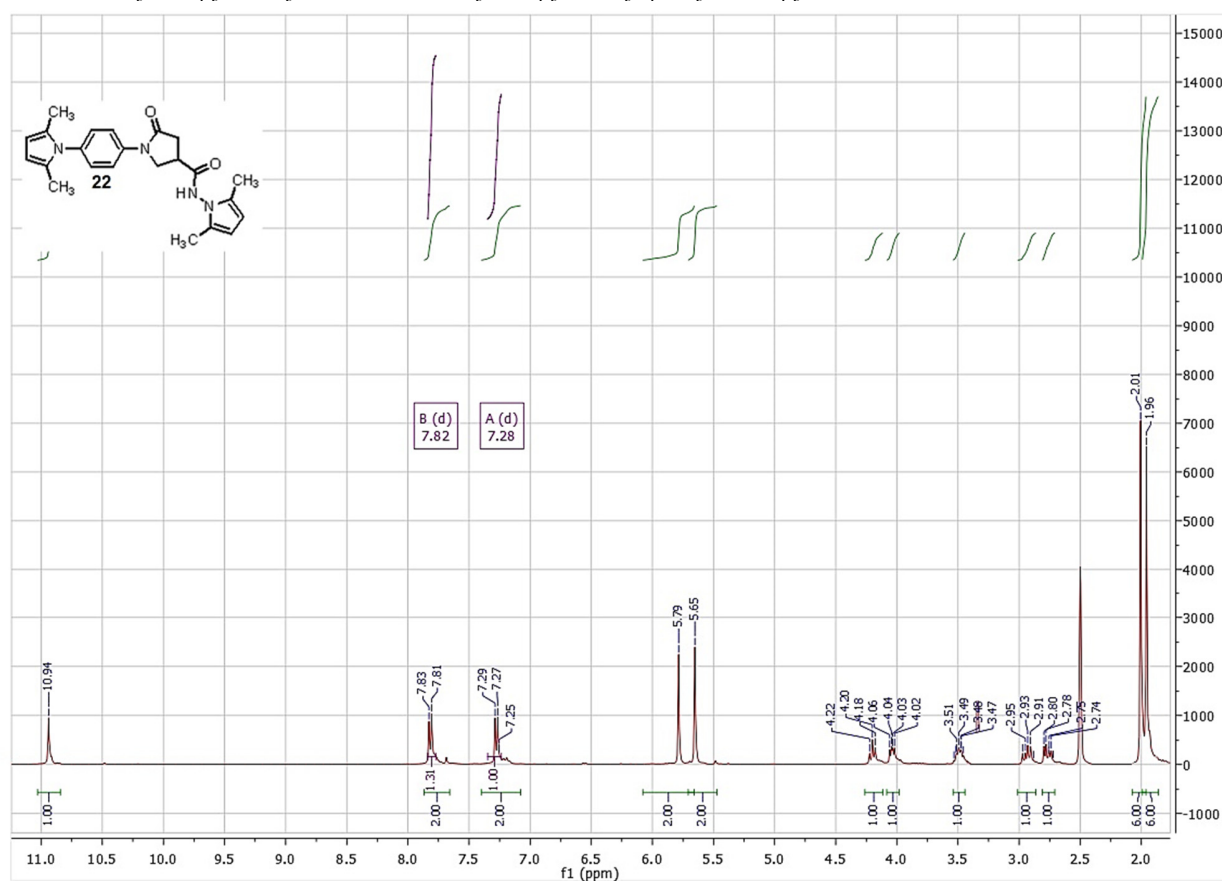

Figure S31. <sup>1</sup>H NMR of compound **22**.

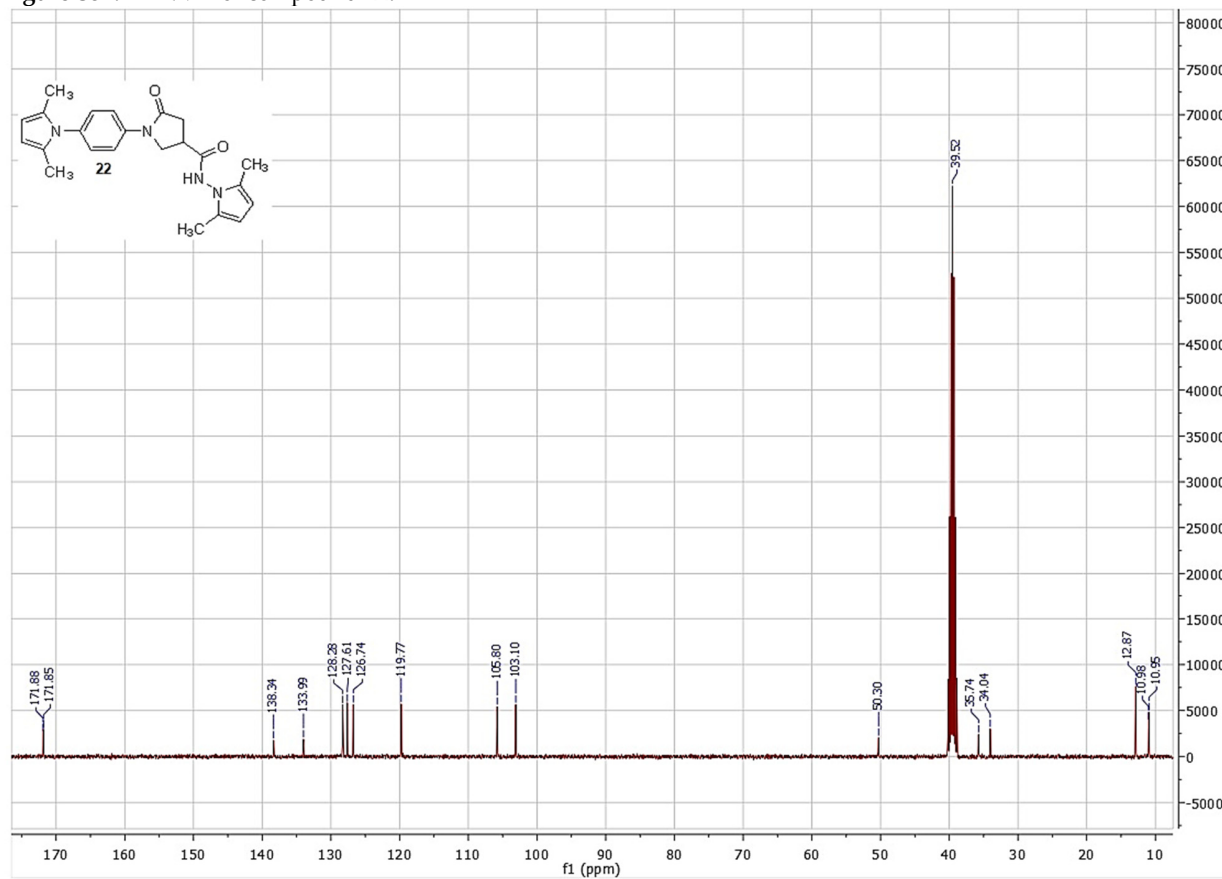

Figure S32. <sup>13</sup>C NMR of compound **22**.

**Table S1.** The minimal inhibitory concentration of compounds **2, 4–22** against tested bacterial pathogens.

| Compound   | MIC (µg/mL)              |                               |                               |                              |                                            |                         |
|------------|--------------------------|-------------------------------|-------------------------------|------------------------------|--------------------------------------------|-------------------------|
|            | <i>S. aureus</i><br>MRSA | <i>K. pneumoniae</i><br>KPC-1 | <i>K. pneumoniae</i><br>NDM-1 | <i>A. baumannii</i><br>NDM-1 | <i>P. aeruginosa</i><br>OprD porin<br>loss | <i>E. coli</i><br>Mcr-1 |
| 2          | >64                      | >64                           | >64                           | >64                          | >64                                        | >64                     |
| 4          | >64                      | >64                           | >64                           | >64                          | >64                                        | >64                     |
| 5          | >64                      | >64                           | >64                           | >64                          | >64                                        | >64                     |
| 6          | >64                      | >64                           | >64                           | >64                          | >64                                        | >64                     |
| 7          | >64                      | >64                           | >64                           | >64                          | >64                                        | >64                     |
| 8          | >64                      | >64                           | >64                           | >64                          | >64                                        | >64                     |
| 9          | >64                      | >64                           | >64                           | >64                          | >64                                        | >64                     |
| 10         | >64                      | >64                           | >64                           | >64                          | >64                                        | >64                     |
| 11         | >64                      | >64                           | >64                           | >64                          | >64                                        | >64                     |
| 12         | >64                      | >64                           | >64                           | >64                          | >64                                        | >64                     |
| 13         | >64                      | >64                           | >64                           | >64                          | >64                                        | >64                     |
| 14         | >64                      | >64                           | >64                           | >64                          | >64                                        | >64                     |
| 15         | >64                      | >64                           | >64                           | >64                          | >64                                        | >64                     |
| 16         | >64                      | >64                           | >64                           | >64                          | >64                                        | >64                     |
| 17         | >64                      | >64                           | >64                           | >64                          | >64                                        | >64                     |
| 18         | >64                      | >64                           | >64                           | >64                          | >64                                        | >64                     |
| 19         | >64                      | >64                           | >64                           | >64                          | >64                                        | >64                     |
| 20         | >64                      | >64                           | >64                           | >64                          | >64                                        | >64                     |
| 21         | 1                        | >64                           | >64                           | >64                          | >64                                        | >64                     |
| 22         | >64                      | >64                           | >64                           | >64                          | >64                                        | >64                     |
| Vancomycin | 2                        | N/A                           | N/A                           | N/A                          | N/A                                        | N/A                     |
| Meropenem  | N/A                      | 8                             | 16                            | 8                            | 4                                          | 1                       |
| Colistin   | N/A                      | 1                             | 4                             | 16                           | 4                                          | 32                      |

**Abbreviations:** N/A – not applicable; MRSA – methicillin resistant *S. aureus*; KPC- *Klebsiella pneumoniae* carbapenemase 1; NDM-1 – New Delhi metallo beta lactamase 1; Mcr-1 – mobile colistin resistance.
